# Supplementary material for: Association between household context and emergency hospital use in older people: a retrospective cohort study on indicators for people living alone or living with somebody with frailty, developed from routine healthcare data in England
Source: PubMed Central journal article supplement — BMJ Open. 2022 May 2;12(5):e059371. doi: 10.1136/bmjopen-2021-059371 (PMC9062795; doi:10.1136/bmjopen-2021-059371), 2022-05-02
Supplement: bmjopen-2021-059371.draft_revisions.pdf [file bmjopen-2021-059371.draft_revisions.pdf]

# BMJ Open

BMJ Open is committed to open peer review. As part of this commitment we make the peer review history of every article we publish publicly available.

When an article is published we post the peer reviewers' comments and the authors' responses online. We also post the versions of the paper that were used during peer review. These are the versions that the peer review comments apply to.

The versions of the paper that follow are the versions that were submitted during the peer review process. They are not the versions of record or the final published versions. They should not be cited or distributed as the published version of this manuscript.

BMJ Open is an open access journal and the full, final, typeset and author-corrected version of record of the manuscript is available on our site with no access controls, subscription charges or pay-per-view fees (<http://bmjopen.bmj.com>).

If you have any questions on BMJ Open's open peer review process please email [info.bmjopen@bmj.com](mailto:info.bmjopen@bmj.com)

# BMJ Open

## Developing social context factors associated with emergency hospital use from national administrative health data: a retrospective cohort study

|                               |                                                                                                                                                                                                                                                                                                                                                                                                                                                 |
|-------------------------------|-------------------------------------------------------------------------------------------------------------------------------------------------------------------------------------------------------------------------------------------------------------------------------------------------------------------------------------------------------------------------------------------------------------------------------------------------|
| Journal:                      | <i>BMJ Open</i>                                                                                                                                                                                                                                                                                                                                                                                                                                 |
| Manuscript ID                 | bmjopen-2021-059371                                                                                                                                                                                                                                                                                                                                                                                                                             |
| Article Type:                 | Original research                                                                                                                                                                                                                                                                                                                                                                                                                               |
| Date Submitted by the Author: | 30-Nov-2021                                                                                                                                                                                                                                                                                                                                                                                                                                     |
| Complete List of Authors:     | Lloyd, Therese; The Health Foundation, Improvement Analytics Unit<br>Crellin, Elizabeth; The Health Foundation, Improvement Analytics Unit<br>Brine, Richard; The Health Foundation, Improvement Analytics Unit<br>Shen, Julia Y.; The Health Foundation, Improvement Analytics Unit;<br>London School of Hygiene and Tropical Medicine Faculty of Public Health and Policy<br>Wolters, Arne; The Health Foundation, Improvement Analytics Unit |
| Keywords:                     | Health policy < HEALTH SERVICES ADMINISTRATION & MANAGEMENT,<br>Health informatics < BIOTECHNOLOGY & BIOINFORMATICS,<br>PREVENTIVE MEDICINE, PUBLIC HEALTH                                                                                                                                                                                                                                                                                      |
|                               |                                                                                                                                                                                                                                                                                                                                                                                                                                                 |

SCHOLARONE™  
Manuscripts

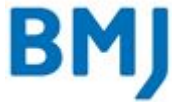

I, the Submitting Author has the right to grant and does grant on behalf of all authors of the Work (as defined in the below author licence), an exclusive licence and/or a non-exclusive licence for contributions from authors who are: i) UK Crown employees; ii) where BMJ has agreed a CC-BY licence shall apply, and/or iii) in accordance with the terms applicable for US Federal Government officers or employees acting as part of their official duties; on a worldwide, perpetual, irrevocable, royalty-free basis to BMJ Publishing Group Ltd ("BMJ") its licensees and where the relevant Journal is co-owned by BMJ to the co-owners of the Journal, to publish the Work in this journal and any other BMJ products and to exploit all rights, as set out in our [licence](#).

The Submitting Author accepts and understands that any supply made under these terms is made by BMJ to the Submitting Author unless you are acting as an employee on behalf of your employer or a postgraduate student of an affiliated institution which is paying any applicable article publishing charge ("APC") for Open Access articles. Where the Submitting Author wishes to make the Work available on an Open Access basis (and intends to pay the relevant APC), the terms of reuse of such Open Access shall be governed by a Creative Commons licence – details of these licences and which [Creative Commons](#) licence will apply to this Work are set out in our licence referred to above.

Other than as permitted in any relevant BMJ Author's Self Archiving Policies, I confirm this Work has not been accepted for publication elsewhere, is not being considered for publication elsewhere and does not duplicate material already published. I confirm all authors consent to publication of this Work and authorise the granting of this licence.

# Developing social context factors associated with emergency hospital use from national administrative health data: a retrospective cohort study

Therese Lloyd\*, Improvement Analytics Unit, The Health Foundation, 8 Salisbury Square, London, EC4Y 8AP, UK, [Therese.Lloyd@health.org.uk](mailto:Therese.Lloyd@health.org.uk), tel: 020 7257 2090

Elizabeth Crellin, Improvement Analytics Unit, The Health Foundation, 8 Salisbury Square, London, EC4Y 8AP, UK, [Liz.Crellin@health.org.uk](mailto:Liz.Crellin@health.org.uk)

Richard Brine, Improvement Analytics Unit, The Health Foundation, 8 Salisbury Square, London, EC4Y 8AP, UK, [Richard.Brine@health.org.uk](mailto:Richard.Brine@health.org.uk)

Julia Y. Shen, Improvement Analytics Unit, The Health Foundation, 8 Salisbury Square, London, EC4Y 8AP, UK, [Julia.Shen@health.org.uk](mailto:Julia.Shen@health.org.uk)

Arne T. Wolters, Improvement Analytics Unit, The Health Foundation, 8 Salisbury Square, London, EC4Y 8AP, UK, [Arne.Wolters@health.org.uk](mailto:Arne.Wolters@health.org.uk)

\*corresponding author

**Keywords:** population health management, social determinants of health, social isolation, health data linkage, secondary care

Word count (main text): 3969

## ABSTRACT

**Objectives:** To derive two social context factors, living alone and living in a two-person household with a person who is frail, from routine administrative health data and to assess their association with emergency hospital use.

**Design:** Retrospective cohort study using national pseudonymised hospital data and pseudonymised address data derived from a central database of all patient registrations in England

**Setting:** England-wide

**Participants:** 4,876,285 people aged 65 years or older registered at GP practices in England on 16 December 2018 who were living alone or in a household of up to six people, and with at least one hospital admission in the last three years.

**Outcomes:** Rates of emergency department (A&E) attendance and inpatient emergency admissions over a 1-year follow-up period.

**Results:** Older people living alone had higher rates of A&E attendances (adjusted rate ratio 1.09, 95% CI 1.09 to 1.10) and emergency admissions (1.14, 95% CI 1.14 to 1.15) than older people living in households of 2-6 people.

Older people living with someone with frailty in a two-person household had higher rates of A&E attendance (adjusted rate ratio 1.09, 95% CI 1.08 to 1.10) and emergency admissions (1.10, 95% CI 1.09 to 1.11) than other older people living in a two-person household.

**Conclusions:** We show that some social context factors can be derived from linked routine administrative health data and that these are strongly associated with higher emergency hospital use. Using social context factors can improve analyses, as well as support in the understanding of local population needs and in population health management.

### Trial registration

Not applicable

### STRENGTHS AND LIMITATIONS OF THIS STUDY:

- Two social context factors, living alone and living with someone with frailty, were derived from pseudonymised routinely collected data; this created valuable additional patient-level information without the need to collect new data.
- National data from approximately 4.9 million people aged 65 or over was used to examine the association of the social context factors and emergency hospital use.
- The analysis adjusted for common demographic and clinical factors predictive of emergency hospital use.
- The study was restricted to individuals aged 65 or over who had a hospital admission in the previous three years, limiting the generalisability of our study.

## BACKGROUND

The 'social determinants of health'[1] - factors outside of the health and social care system that affect a person's health, such as social networks, housing, education and employment opportunities – have long been recognised in the UK [2,3] and globally.

There is some evidence that a person's social circumstances inform care: Stokes et al found that when identifying patients for multidisciplinary teams (MDTs), medical practitioners felt that the patients' needs were often primarily related to socio-economic factors such as isolation, poor housing or living arrangements, and other issues.[4] Some MDTs are aiming to address social, as well as health, needs [5] and others are even specifically targeting people with non-clinical needs, with the aim of addressing social needs which might otherwise lead to deteriorating health and escalating medical needs.[6]

However, unlike other risks observed by clinicians that are included in population health management tools,[7] social context is not routinely captured in NHS or social care datasets, and where these are collected, they are often recorded in free text fields. Information on patients' circumstances is therefore not readily retrievable to either hospital staff, or to analysts, commissioners or policy makers when analysing, planning or commissioning care, who often rely on the information coded in electronic health records.

The national health service (NHS) in England holds a central database of all patient registrations in England, which includes their address details. By assigning a Unique Property Reference Number (UPRN) to each address and pseudonymising the UPRN, it is possible to derive information on household composition while maintaining patients' anonymity. This information can be used to create proxies for some important social context factors that may affect people's health and health outcomes.

In this paper we demonstrate the value of deriving social context factors from routinely collected address data and of using them in analysis, in understanding local populations and in planning population health management. We do this by looking at two social context indicators: a) living alone, and b) living with one other person who is frail.

Living alone might be linked to social isolation, which has been found to be associated with both increased morbidity and mortality.[8,9] Living alone does not necessarily mean someone is socially isolated; for example, approximately one-third of people aged 65 or over live on their own[10] but many may have friends or family living nearby. However, living alone has been found to be associated with emergency (unplanned) hospital use within one GP practice in South East London,[11] indicating that living alone still signals important social context at population level and warrants further investigation.

Living with someone with frailty may imply informal care responsibilities. Informally caring for somebody else can have a detrimental effect on a person's own physical and mental health.[12–14] Informal carers may not only feel socially isolated,[9] but may also suffer from lack of sleep and neglect their own health and personal wellbeing,[15,16] or have difficulty accessing care.[17] A large England-wide survey of informal carers found they had worse health-related quality of life, with a disproportionate burden for already-marginalised groups.[17] According to the 2011 Census, 1.3 million (14%) people aged 65 or over living in households in England and Wales provided unpaid care in 2011, many of whom provided 50

1  
2  
3 hours or more unpaid care a week.[18] There may now be over 2 million people aged 65 or  
4 older who are carers, with a significant proportion of carers aged 85 and over caring for  
5 someone with multiple needs, often including dementia.[19]  
6

7  
8 This retrospective cohort study focuses on older people, as this population is at particular  
9 risk of emergency hospital admission. Although there are different groups of people at risk of  
10 social isolation, not least young people leaving home for the first time, older people are at  
11 more risk of social isolation as a result of loss of physical or mental ability, caring  
12 responsibilities and deaths of close family and friends.[9]  
13

## 14 **METHODS**

### 15 **Data sources and linkage**

16  
17 We accessed a minimised version of the Master Patient Index (MMPI), a health data set  
18 based on English GP registration data. This dataset included patient gender, month and  
19 year of birth (and death where applicable), lower super output area (LSOA) and  
20 pseudonymised UPRNs. UPRNs are the official unique identifier of every spatial address in  
21 Great Britain[20] and were applied to each address location in the MMPI data and  
22 pseudonymised by our data suppliers. We did not have access to actual patient addresses.  
23 Building on previous work to identify care home residents from UPRNs,[21] we also  
24 accessed a flag to indicate if a property was a care home. The individual's LSOA was used  
25 to link to small area statistics provided by the Office for National Statistics on socio-  
26 economic deprivation, rurality and region.  
27  
28  
29  
30

### 31 **Study population and outcomes**

32  
33 Our study population consisted of all people aged 65 years or older registered at GP  
34 practices in England on 16 December 2018 who were living alone or in a household of up to  
35 six people. Household size was limited to six in order to exclude people living in  
36 establishments, as their care provision may differ from that of a single household. This  
37 restriction excluded less than 2% of households [10]. We excluded individuals without a valid  
38 pseudonymised UPRN or living in care homes at the study start date, and those living at  
39 properties containing seven or more people at any time in the year prior to the study start.  
40 People not admitted to hospital in the previous three years were also excluded, as hospital  
41 records were used to identify long-term conditions and ethnicities (Supplementary File 1).  
42  
43  
44

45 Where both individuals in a two-person household were aged 65 or over, both individuals  
46 were included in the study population and contributed to the analysis; however, if one  
47 household member was under 65, this member was not included in the study population but  
48 did contribute to defining the social context of their cohabitee.  
49

50  
51 Using a common pseudonymised NHS number, we linked the MMPI data to Secondary  
52 Uses Service [SUS] hospital data from the previous three years. For any individual aged 65  
53 or over with linked hospital records we identified their long-term conditions, secondary care  
54 use and top-level ethnicity (based on the mode of ethnicities recorded).  
55

56 The maximum follow-up period (study length) was one year unless censored because the  
57 person died, moved into a care home or their household composition changed.  
58  
59  
60



1  
2  
3 We examined rates of emergency department (A&E) attendance and inpatient emergency  
4 admissions in the follow-up period.  
5

### 6 **Social context factors**

7  
8 A person was defined as living alone if there was no other person with the same UPRN  
9 during the study period. For individuals living in two-person households we also linked the  
10 hospital records of their cohabitee, where these existed, to identify if the individual was living  
11 with someone recorded as frail. A person was identified as frail if they had any of the  
12 conditions or events in Soong et al's list of syndromes[22,23] coded in inpatient records in  
13 the previous three years. These include cognitive impairment, mobility problems and  
14 pressure ulcers, which may require care or support from their cohabitee.  
15  
16

17  
18 Both social context factors may be proxies for social isolation. Social isolation reflects a lack  
19 of social ties, social integration or sense of community,[24] and can be due to a number of  
20 factors, including bereavement and constraints on mobility.[9] Social isolation is related but  
21 distinct from loneliness, which is a subjective feeling associated with actual or perceived  
22 isolation. However, both factors may also pick up on other unobserved confounders of  
23 health outcomes; for example living alone may also have a detrimental effect on personal  
24 nutrition, while living with someone with frailty may lead to neglecting one's own needs and  
25 care.  
26  
27

### 28 **Statistical methods**

29  
30 We used multivariable regression to examine the association between emergency health  
31 care use (emergency department attendances and emergency hospital admissions,  
32 respectively) and a) living alone and b) living with someone with frailty. We did this by  
33 comparing living alone to living in a household of two to six people and, separately,  
34 comparing living in a two-person household with a person with frailty to living in a two-person  
35 household where the cohabitee was not recorded as frail.  
36  
37

38 We ran both crude and adjusted analyses. Adjusted analyses included age, gender,  
39 ethnicity, English region, socio-economic deprivation, rural/urban classification, a range of  
40 long-term conditions recorded in the previous three years: those predictive of emergency  
41 hospital use,[25,26] frailty indicators,[22,23] history of mental or serious mental ill-health[27]  
42 and historic emergency hospital use in the last twelve months, including emergency  
43 admissions for chronic ambulatory care sensitive and acute urgent care sensitive conditions  
44 (Supplementary File 2). We aimed to include as covariates as many variables as possible  
45 without overparametrising the model in order to remove any known confounding. We used a  
46 negative binomial model as the data was overdispersed. Rate ratios were produced to  
47 interpret the results.  
48  
49

### 50 **Subgroup analysis**

51  
52 We investigated whether the emergency hospital use of people living with someone with  
53 frailty differed depending on if they were male or female, as women in general provide more  
54 informal care than men.[28] We also investigated whether the emergency hospital use of  
55 people living alone differed according to their level of deprivation, as this may affect a  
56 person's access to informal or formal care (neither of which we can determine in our data).  
57 Differences in the rate ratios between population subgroups was examined by fitting a  
58  
59  
60



1  
2  
3 multivariable regression model including an interaction term between the social context  
4 factor and the population segment.  
5

### 6 **Sensitivity analysis**

7  
8 In the main analyses people were censored at the time their household composition  
9 changed. There is a risk that that household change could be driven by deteriorating health,  
10 for example if a person living alone had worsening illness and moved into a care home. This  
11 would underestimate a person's health care needs if they had continued living alone.  
12 Therefore, a sensitivity analysis examined only those whose household composition did not  
13 change over the year.  
14  
15

16 The main analyses adjusted for, among other covariates, emergency hospital use in the  
17 twelve months prior to the analysis period, as these variables may reflect the clinical severity  
18 of a patient's condition, which can be difficult to deduce from electronic health records.  
19 However, prior hospital use may also be affected by social context factors at that time (e.g.  
20 living alone or living with somebody with frailty), potentially underestimating the effect of  
21 these social context variables. Therefore, we performed analyses omitting prior hospital use  
22 as covariates.  
23  
24

### 25 **Patient and public involvement**

26  
27 We sought input from a patient representative at the development stage, including on choice  
28 and relevance of social context factors. There was further engagement with this same and  
29 another representative on the interpretation of results and on an early draft of the paper.  
30  
31

## 32 **RESULTS**

### 33 **Study populations**

34  
35 After applying the inclusion and exclusion criteria, there were 4,876,285 people aged over  
36 65, registered with an English GP and living in England, with at least one hospital admission  
37 in the last three years and living in a household of up to six people (Supplementary File 1).  
38 The largest exclusion was due to no hospital admission in the previous three years  
39 (approximately 5m). Of the remaining individuals, 1,464,379 (30.03%) lived alone and  
40 2,459,937 (50.45%) lived in a two-person household (Table 1).  
41  
42

43  
44 People living alone were more often female (66% vs 47%) and on average older (median  
45 age 79 vs 74) compared with people living in households of 2-6 people (Table 1,  
46 Supplementary File 2). They also lived in more deprived areas; 19% lived in the most  
47 deprived quintile compared to 13% of individuals living in households of 2-6 people.  
48 Furthermore, more people living alone were frail (33% vs 21%, with on average 0.51 vs 0.30  
49 frailty syndromes) and they had higher levels of multimorbidity (on average 2.30 vs 1.97  
50 conditions) compared with people in households of 2-6 people. They also had greater  
51 numbers of A&E attendance and emergency admissions in the twelve months prior to our  
52 study period (0.74 vs 0.56 and 0.48 vs 0.34, respectively) than people in households of 2-6  
53 people.  
54  
55

56  
57 Among people aged 65 or over living in two-person households, people living with someone  
58 with frailty had a median age of 77, compared with 74 for people living with a cohabitee who  
59 was not recorded as frail (Table 1, Supplementary File 2). 54% (vs 52%) were male and  
60

1  
2  
3 14% (vs 12%) lived in the most deprived quintile. People living with someone with frailty  
4 were on average themselves more likely to be frail (27% vs 20%), with on average 0.40 (vs  
5 0.28) frailty syndromes, and had more long-term conditions (2.22 vs 1.92). They also had  
6 greater rates of A&E attendance and emergency admissions in the twelve months prior (0.67  
7 vs 0.53 and 0.42 vs 0.32, respectively) compared with people living with a cohabitee who  
8 was not recorded as frail.  
9  
10  
11  
12  
13  
14  
15  
16  
17  
18  
19  
20  
21  
22  
23  
24  
25  
26  
27  
28  
29  
30  
31  
32  
33  
34  
35  
36  
37  
38  
39  
40  
41  
42  
43  
44  
45  
46  
47  
48  
49  
50  
51  
52  
53  
54  
55  
56  
57  
58  
59  
60

For peer review only

Table 1. Baseline characteristics. Created by the authors

|                                                         | People 65+ years living in households up to 6 people* |              |                  | People 65+ years living in households of 2 people* |                                  |                                 |
|---------------------------------------------------------|-------------------------------------------------------|--------------|------------------|----------------------------------------------------|----------------------------------|---------------------------------|
|                                                         | All                                                   | Living Alone | Not living alone | All                                                | Living with someone with frailty | Cohabitee not recorded as frail |
| Total study population (65 years+)                      | 4,876,285                                             | 1,464,379    | 3,411,906        | 2,459,937                                          | 255,312                          | 2,204,625                       |
| Male                                                    | 47.04%                                                | 34.02%       | 52.63%           | 52.44%                                             | 53.84%                           | 52.28%                          |
| Age, median [IQR]                                       | 75 [70, 81]                                           | 79 [72, 85]  | 74 [69, 79]      | 74 [70, 80]                                        | 77 [71, 83]                      | 74 [70, 80]                     |
| Ethnicity                                               |                                                       |              |                  |                                                    |                                  |                                 |
| White                                                   | 80.96%                                                | 83.06%       | 80.06%           | 82.85%                                             | 84.64%                           | 82.64%                          |
| Mixed                                                   | 0.23%                                                 | 0.23%        | 0.23%            | 0.17%                                              | 0.16%                            | 0.17%                           |
| Asian                                                   | 2.55%                                                 | 1.12%        | 3.16%            | 1.53%                                              | 1.38%                            | 1.55%                           |
| Black                                                   | 1.11%                                                 | 1.11%        | 1.11%            | 0.66%                                              | 0.54%                            | 0.67%                           |
| Other                                                   | 0.62%                                                 | 0.51%        | 0.67%            | 0.46%                                              | 0.40%                            | 0.46%                           |
| Not stated/missing                                      | 14.52%                                                | 13.96%       | 14.76%           | 14.33%                                             | 12.88%                           | 14.50%                          |
| Deprivation                                             |                                                       |              |                  |                                                    |                                  |                                 |
| Quintile #5 (least deprived quintile)                   | 23.37%                                                | 19.71%       | 24.94%           | 26.19%                                             | 24.52%                           | 26.38%                          |
| Quintile #4                                             | 22.87%                                                | 20.89%       | 23.72%           | 24.45%                                             | 23.27%                           | 24.59%                          |
| Quintile #3                                             | 21.29%                                                | 20.97%       | 21.43%           | 21.51%                                             | 21.22%                           | 21.54%                          |
| Quintile #2                                             | 17.68%                                                | 19.63%       | 16.84%           | 16.08%                                             | 17.03%                           | 15.96%                          |
| Quintile #1 (most deprived quintile)                    | 14.80%                                                | 18.80%       | 13.08%           | 11.77%                                             | 13.95%                           | 11.52%                          |
| Rural location                                          | 22.27%                                                | 19.08%       | 23.64%           | 25.04%                                             | 22.56%                           | 25.32%                          |
| Diagnosis history (previous three years)                |                                                       |              |                  |                                                    |                                  |                                 |
| No. frailty syndromes, mean (SD)                        | 0.36 (0.76)                                           | 0.51 (0.90)  | 0.30 (0.68)      | 0.29 (0.67)                                        | 0.40 (0.80)                      | 0.28 (0.65)                     |
| No. Elixhauser conditions, mean (SD)                    | 2.07 (1.90)                                           | 2.30 (1.99)  | 1.97 (1.85)      | 1.95 (1.83)                                        | 2.22 (1.96)                      | 1.92 (1.81)                     |
| Frailty (1+ frailty related syndrome)                   | 24.69%                                                | 32.72%       | 21.24%           | 21.05%                                             | 26.90%                           | 20.37%                          |
| Multimorbidity (2+ Elixhauser conditions)               | 53.83%                                                | 58.93%       | 51.64%           | 51.15%                                             | 57.09%                           | 50.46%                          |
| History of mental ill health                            | 21.19%                                                | 26.18%       | 19.05%           | 18.30%                                             | 22.27%                           | 17.84%                          |
| Rates of hospital usage (previous 12 months), mean (SD) |                                                       |              |                  |                                                    |                                  |                                 |
| A&E attendances                                         | 0.61 (1.27)                                           | 0.74 (1.50)  | 0.56 (1.16)      | 0.54 (1.14)                                        | 0.67 (1.30)                      | 0.53 (1.11)                     |

|                      | People 65+ years living in households up to 6 people* |                |                  | People 65+ years living in households of 2 people* |                                  |                                 |
|----------------------|-------------------------------------------------------|----------------|------------------|----------------------------------------------------|----------------------------------|---------------------------------|
|                      | All                                                   | Living Alone   | Not living alone | All                                                | Living with someone with frailty | Cohabitee not recorded as frail |
| Emergency admissions | 0.38<br>(0.88)                                        | 0.48<br>(1.01) | 0.34<br>(0.81)   | 0.33<br>(0.80)                                     | 0.42<br>(0.93)                   | 0.32<br>(0.79)                  |

For more baseline characteristics, please see Supplementary File 2.

\*Study population consisted of all people aged 65 years or older, registered at GP practices in England on 16 December 2018 and living in England, with a valid pseudonymised UPRN, not living in a care home, living in a household of 6 people or fewer, and with at least one hospital admission in the previous three years.

### Statistical analysis

People aged 65 or over living alone had on average 0.78 A&E attendances per person per year in the follow-up period, compared with 0.56 for people living in households of 2-6 people. They had on average 0.51 emergency admissions per person per year, compared with 0.33 for people living in households of 2-6 people (Table 2). Without adjusting for observed differences in baseline characteristics, people living alone had substantially higher rates of both A&E attendance (unadjusted rate ratio 1.44, 95% confidence interval (CI) 1.43 to 1.44) and emergency admissions (unadjusted rate ratio 1.60, 95% CI 1.60 to 1.61) than people living in households of 2-6 people (Table 3).

Table 2. Crude rates of secondary use (number of events per person per year). Created by the authors

|                                    | People 65+ years living in households up to 6 people |             |                  |             | People 65+ years living in households of 2 people |             |                                 |             |
|------------------------------------|------------------------------------------------------|-------------|------------------|-------------|---------------------------------------------------|-------------|---------------------------------|-------------|
|                                    | Living alone                                         |             | Not living alone |             | Living with someone with frailty                  |             | Cohabitee not recorded as frail |             |
| Outcomes over the follow-up period | Events                                               | Crude rate* | Events           | Crude rate* | Events                                            | Crude rate* | Events                          | Crude rate* |
| Total number people                | 1,464,379                                            |             | 3,411,906        |             | 255,312                                           |             | 2,204,625                       |             |
| Person-years of follow up          | 1,359,094                                            |             | 3,251,440        |             | 226,373                                           |             | 2,077,846                       |             |
| A&E attendances                    | 1,062,731                                            | 0.78        | 1,818,519        | 0.56        | 157,137                                           | 0.69        | 1,102,683                       | 0.53        |
| Emergency admissions               | 692,345                                              | 0.51        | 1,073,870        | 0.33        | 98,584                                            | 0.44        | 654,784                         | 0.32        |

\*Number of events per person, per year.

After adjusting for baseline characteristics, we found that people living alone still had statistically significantly higher rates of A&E attendances (adjusted rate ratio 1.09, 95% CI 1.09 to 1.10) and emergency admissions (1.14, 95% CI 1.14 to 1.15, Table 3).

People living with someone with frailty had on average 0.69 A&E attendances per person per year, compared with 0.53 for people living in two-person households where the cohabitee was not recorded as frail. They had on average 0.44 emergency admissions per person per year, compared with 0.32 for people living in two-person households where the cohabitee was not recorded as frail (Table 2). Before adjusting for observed differences in baseline characteristics, people living with someone with frailty had rate ratios of 1.33 (95% CI 1.32 to 1.34) and 1.42 (95% CI 1.41 to 1.44) for A&E attendances and emergency admissions, respectively, compared with people aged 65 or over living in two-person households where the cohabitee was not recorded as frail (Table 3).

After adjusting for baseline characteristics, people living with someone with frailty in a two-person household still had statistically significantly higher rates of both A&E attendance (adjusted rate ratio 1.09, 95% CI 1.08 to 1.10) and emergency admissions (1.10, 95% CI 1.09 to 1.11, Table 3).

Table 3. Results of unadjusted and adjusted regression models. Created by the authors

|                                         | Unadjusted model |                |         | Adjusted model |                |         |
|-----------------------------------------|------------------|----------------|---------|----------------|----------------|---------|
|                                         | Rate ratio       | 95%CI          | P value | Rate ratio     | 95% CI         | P value |
| <b>Living alone</b>                     |                  |                |         |                |                |         |
| A&E attendances                         | 1.44             | (1.43 to 1.44) | <0.001  | 1.09           | (1.09 to 1.10) | <0.001  |
| Emergency admissions                    | 1.60             | (1.60 to 1.61) | <0.001  | 1.14           | (1.14 to 1.15) | <0.001  |
| <b>Living with someone with frailty</b> |                  |                |         |                |                |         |
| A&E attendances                         | 1.33             | (1.32 to 1.34) | <0.001  | 1.09           | (1.08 to 1.10) | <0.001  |
| Emergency admissions                    | 1.42             | (1.41 to 1.44) | <0.001  | 1.10           | (1.09 to 1.11) | <0.001  |

Adjusted models included as covariates gender, age, deprivation, ethnicity, English region, rural location, history of a range of diagnoses in previous 3 years and historic emergency hospital use in the last 12 months (covariates listed in Supplementary File 2).

## Subgroup analysis

1  
2  
3 There was no evidence that the adjusted rate ratio for A&E attendances or emergency  
4 admissions was statistically significantly different depending on if the person who was living  
5 with somebody with frailty was male or female (interaction test  $p=0.101$  and  $p=0.297$ ,  
6 respectively, Supplementary File 3).  
7

8  
9 There was a statistically significant difference in the rate ratios of living alone for different  
10 levels of deprivation compared with the least deprived quintile (interaction tests  $p<0.02$ ) in all  
11 but the third quintile (i.e. the middle group). While people living alone had higher rates of  
12 emergency hospital use than those not living alone in each of the five IMD quintiles, the rate  
13 ratio for the association between living alone and A&E attendances was lowest in the most  
14 deprived quintile (adjusted rate ratio 1.07, 95% CI 1.06 to 1.08) and highest in the least  
15 deprived quintile (adjusted rate ratio 1.11, 95% CI 1.10 to 1.11). Similarly, for emergency  
16 admissions, it varied between 1.10 (95% CI 1.09 to 1.11) in the most deprived quintile and  
17 1.17 (95% CI 1.15 to 1.18) in the least deprived quintile (Supplementary File 3). In other  
18 words, the association between living alone and increased hospitalisation was stronger for  
19 *less* deprived groups.  
20  
21

### 22 **Sensitivity analysis**

23  
24 Limiting the study population to individuals whose household composition did not change  
25 over the year, the adjusted rate ratio for living alone compared with households of 2-6  
26 people for A&E attendance was 1.06 (95% CI 1.06 to 1.07) and for emergency admissions  
27 1.10 (95% CI 1.09 to 1.10), (Supplementary File 4). For the analysis of living with someone  
28 with frailty, the adjusted rate ratio for A&E attendance was 1.08 (95% CI 1.07 to 1.09) and  
29 for emergency admissions 1.08 (95% CI 1.07 to 1.09).  
30  
31

32  
33 Adjusting for baseline characteristics excluding prior emergency hospital use, the adjusted  
34 rate ratio for A&E attendance was 1.11 (95% CI 1.11 to 1.12) and for emergency admissions  
35 1.16 (95% CI 1.15 to 1.16) (Supplementary File 4). For the analysis of living with someone  
36 with frailty in a two-person household, the adjusted rate ratio for A&E attendance was 1.11  
37 (95% CI 1.10 to 1.12) and for emergency admissions 1.11 (95% CI 1.10 to 1.12).  
38  
39

## 40 **DISCUSSION**

41  
42 Our analysis showed that both living alone and living with somebody with frailty are strongly  
43 associated with higher emergency hospital use. We found that differences in demographic  
44 characteristics and underlying health conditions explain most of this association but even  
45 after adjusting for baseline demographic and clinical characteristics, people living alone  
46 attend A&E 9% more often and are admitted to hospital in an emergency 14% more often  
47 than those living with others. Similarly, individuals living with someone who has frailty attend  
48 A&E 9% more often and are admitted to hospital as an emergency 10% more often than  
49 others in a two-person household.  
50  
51

52  
53 It is important to note that these social context metrics are merely proxies for people's true  
54 social isolation. For example, an individual residing alone may have a rich social network of  
55 family and friends or have access to formal or informal care; routine administrative data  
56 cannot capture these nuances. Nevertheless, we have found a strong association between  
57 these two factors and emergency hospital use, even when correcting for other factors  
58 predictive of hospital use.  
59  
60

1  
2  
3 Ideally a person's level of social isolation and support needs should be assessed individually  
4 and in person, especially for their clinical management. However, this analysis demonstrates  
5 how existing administrative information can be used to derive social context proxies that can  
6 be used in the absence of such information being recorded. These social context factors  
7 could improve population risk algorithms, budget models, or initial service eligibility criteria.  
8 For instance, these factors could be used to help identify populations for targeted  
9 anticipatory care initiatives such as multidisciplinary teams (MDTs) that may be able to  
10 mitigate some social as well as medical risk factors to prevent later deteriorating health or  
11 hospitalisation.  
12  
13

14 Social context factors can also contribute to more robust research and evaluation by  
15 allowing for the adjustment of previously unobserved characteristics affecting health care  
16 outcomes, thereby decreasing the risk of bias in analyses.  
17  
18

19 This analysis found that, although higher levels of deprivation are associated with higher  
20 emergency hospital use, the interaction between level of deprivation and living alone was  
21 less predictable, with individuals living alone in the most deprived areas having a lower rate  
22 ratio (compared with those not living alone in the most deprived areas) than individuals living  
23 alone in the least deprived areas. It is not possible to determine from our analyses why this  
24 may be. It may be that there are differences in health-seeking behaviours, or different  
25 access to formal or informal care outside of the household, which in turn could lead to either  
26 more (if identifying need) or less (if addressing need) emergency hospital use. Qualitative  
27 research is needed in order to understand the mechanisms behind these results, and to  
28 provide context and nuance.  
29  
30

### 31 **Strengths and limitations**

32 While prior studies of social isolation have used survey or local data, this analysis uses  
33 routinely collected national data from approximately 4.9m people aged 65 or over, thereby  
34 providing robust findings. Through accessing other routine data collections, the analysis  
35 could control for common demographic and clinical factors predictive of emergency hospital  
36 use, including many long-term conditions. However, the study population was restricted to  
37 people in England aged 65 and over, who were admitted to hospital in the three years prior  
38 to our analysis. Although this allowed for the derivation of pre-existing conditions from  
39 previous hospital records, our analysis is restricted to people that are older and sicker  
40 compared with the overall population, limiting the generalisability of our findings.  
41 Furthermore, the analysis was restricted to households of up to 6 people, in order to exclude  
42 communal establishments such as care home or prisons. Excluding households of 7 or more  
43 people will likely disproportionately exclude people from certain ethnic backgrounds, who  
44 more often have multigenerational households.[29]  
45  
46  
47  
48  
49

50 Our findings are nonetheless broadly consistent with other studies that have previously  
51 found strong links between older people living alone and their emergency hospital  
52 use.[11,30,31] To our knowledge, there are no studies on living with someone with frailty,  
53 although results are broadly consistent with the literature on informal carers. A study on  
54 multimorbidity within households found inconsistent results of cohabittees' multimorbidity  
55 status on emergency hospital use.[13]  
56  
57

58 The social context factors were derived from address information collected by general  
59 practices in England. For these to be accurate, address information needs to be up-to-date.  
60



1  
2  
3 Anecdotal evidence suggests that address information is typically well recorded, particularly  
4 for the older population, but it is not possible to validate this.  
5

6 Individuals' health conditions derived from hospital admission records may be underreported  
7 [32] and therefore not fully adjusted for in analysis. In particular, frailty may be underreported  
8 [22] or reported differently to general practice.[33]. If some individuals who have a cohabitee  
9 with frailty were misclassified, the association with emergency hospital use was potentially  
10 underestimated. IMD quintiles are based on an individual's local neighbourhood and may not  
11 reflect an individual's economic circumstances. Ethnicity was derived from hospital records,  
12 the best available source for large-scale linkage. However, SUS has known limitations:  
13 minority ethnic groups are under-represented compared with national census, there are  
14 substantial proportions of records with a code of 'not stated', 'not known' and 'other', and  
15 these are not uniformly distributed across ethnic groups.[34] SUS data does not include all  
16 mental health trust activity; therefore emergency admissions for mental health issues may  
17 be underreported.  
18  
19  
20

21 The study only looks at hospital use over a one-year period due to data constraints.  
22 Although this allows for an accurate reflection of the population, and accounts for  
23 seasonality, the impact of social context may have materialised either earlier or later than  
24 the study period, and so would ideally have been estimated from a long-term cohort.  
25  
26

### 27 **Future work**

28  
29 Other social context factors can be developed using the UPRNs derived from GP  
30 registration data including recent bereavement, recent change to living alone, moving into a  
31 care home or multiple moves within a period, which may be a proxy for unstable housing.  
32  
33  
34  
35

## 36 **CONCLUSION**

37  
38 This study shows 'proof of concept' that nationally collected address data can be used to  
39 determine social context factors that provide important and useful information to understand  
40 patients' health and care needs, while maintaining patient confidentiality by using  
41 pseudonymised address information.  
42  
43

44 Both living alone and living with a person with frailty were shown to be strongly associated  
45 with higher emergency hospital use. Although other research shows similar links, this is, to  
46 our knowledge, the first time that an analysis on routine data on a national scale has been  
47 used, underlining the importance of these social context factors in understanding individuals'  
48 health risk, and demonstrating the value of harnessing these data when identifying  
49 individuals for targeted interventions, e.g. MDTs. Informal carers, who play a critical role in  
50 our health and social care system, are often overlooked; these analyses provide evidence  
51 that it is crucial to provide additional support to this group, as well as those living alone.  
52  
53

54 Although these metrics cannot replace a personal assessment of an individual's social  
55 context and support needs, our analyses demonstrate that these social context factors can  
56 be used not only to improve analyses, but also for planning, commissioning, and population  
57 health management.  
58  
59  
60

## ACKNOWLEDGEMENTS

The authors thank Lynn Laidlaw for her input during the development stage and to her and Joanna C, both patient representatives, for their insights and comments on an early draft. We also thank Stefano Conti and Emma Vestesson for advice on the analysis, and Stephen O'Neill, Hardeep Aiden, Adam Tinson, Kathryn Marszalek and Mai Stafford for their comments on an earlier draft. This work uses data provided by patients and collected by the NHS as part of their care and support.

## FUNDING

JS received PhD funding from UKRI/Economic and Social Research Council.

## COMPETING INTERESTS

None

## CONTRIBUTORS

TL and RB designed the study. RB derived the social context indicators and created the analysis dataset. LC performed the analysis. All authors contributed to the interpretation of the work. TL, RB and LC drafted the paper; all authors revised and contributed to the paper. All authors read and approved the final manuscript.

## RESEARCH ETHICS APPROVAL

This study requires no ethics board approval as the analysis uses pseudonymised data transferred by the National Commissioning Data Repository to the Improvement Analytics Unit, which is a data processor on behalf of NHS England and NHS Improvement.

## DATA SHARING

No additional data available

## REFERENCES

- 1 The Health Foundation. Social determinants of health. <https://www.health.org.uk/topics/social-determinants-of-health> (accessed 12 Oct 2021).
- 2 Marmot M, Allen J, Goldblatt P, *et al*. Fair society, healthy lives: strategic review of health inequalities in England post-201. London: 2010. <http://www.instituteofhealthequity.org/resources-reports/fair-society-healthy-lives-the-marmot-review/fair-society-healthy-lives-full-report-pdf.pdf> (accessed 21 Jun 2018).
- 3 Marmot M, Wilkinson RG. *Social determinants of health*. 2nd ed. Oxford: : Oxford University Press 2005.
- 4 Stokes J, Riste L, Cheraghi-Sohi S. Targeting the 'right' patients for integrated care: Stakeholder perspectives from a qualitative study. *J Heal Serv Res Policy* 2018;**23**:243–51. doi:10.1177/1355819618788100
- 5 Stokes J, Panagioti M, Alam R, *et al*. Effectiveness of Case Management for 'At Risk' Patients in Primary Care: A Systematic Review and Meta-Analysis. *PLoS One* 2015;**10**:e0132340. doi:10.1371/journal.pone.0132340
- 6 Brown S. Qualitative evaluation of South Warwickshire Place Based Teams. 2021. [https://www.sqw.co.uk/application/files/7116/3734/2876/SW\\_PBTS.pdf](https://www.sqw.co.uk/application/files/7116/3734/2876/SW_PBTS.pdf)
- 7 Lewis G, Curry N, Bardsley M. Choosing a predictive risk model : a guide for commissioners in England. 2011;:20.
- 8 Holt-Lunstad J, Smith TB, Baker M, *et al*. Loneliness and Social Isolation as Risk Factors for Mortality: A Meta-Analytic Review. *Perspect Psychol Sci* 2015;**10**:227–37. doi:10.1177/1745691614568352
- 9 Aiden H. Isolation and Loneliness: An overview of the literature. 2016. <https://www.redcross.org.uk/-/media/documents/about-us/research-publications/health-and-social-care/co-op-isolation-loneliness-overview.pdf>
- 10 Sanders S. Families and households in the UK: 2019. 2019. <https://www.ons.gov.uk/peoplepopulationandcommunity/birthsdeathsandmarriages/families/datasets/familiesandhouseholds>
- 11 Dreyer K, Steventon A, Fisher R, *et al*. The association between living alone and health care utilisation in older adults : a retrospective cohort study of electronic health records from a London general practice. 2018;:15–7. doi:10.1186/s12877-018-0939-4
- 12 Bom J, Bakx P, Schut F, *et al*. The Impact of Informal Caregiving for Older Adults on the Health of Various Types of Caregivers: A Systematic Review. *Gerontologist* 2019;**59**:e629–42. doi:10.1093/geront/gny137
- 13 Stafford M, Deeny SR, Dreyer K, *et al*. Multiple long-term conditions within households and use of health and social care: a retrospective cohort study. *BJGP Open* 2021;**5**:1–14. doi:10.3399/BJGPO.2020.0134
- 14 Carers UK. State of Caring 2018. 2018. <https://www.carersuk.org/for-professionals/policy/policy-library/state-of-caring-2018-2>
- 15 Vasileiou K, Barnett J, Barreto M, *et al*. Experiences of loneliness associated with being an informal caregiver: A qualitative investigation. *Front Psychol* 2017;**8**:1–11. doi:10.3389/fpsyg.2017.00585
- 16 Harding R, Epiphaniou E, Hamilton D, *et al*. What are the perceived needs and challenges of informal caregivers in home cancer palliative care? Qualitative data to construct a feasible psycho-educational intervention. *Support Care Cancer* 2012;**20**:1975–82. doi:10.1007/s00520-011-1300-z
- 17 Thomas GPA, Saunders CL, Roland MO, *et al*. Informal carers' health-related quality of life and patient experience in primary care: Evidence from 195,364 carers in England responding to a national survey. *BMC Fam Pract* 2015;**16**:14–21. doi:10.1186/s12875-015-0277-y
- 18 Office for National Statistics. What does the 2011 Census tell us about older people. 2013. <https://www.ons.gov.uk/peoplepopulationandcommunity/birthsdeathsandmarriages/ageing/articles/whatdoesthe2011censustellusaboutolderpeople/2013-09-06> (accessed 13 Oct 2021).

- 1  
2  
3 19 Carers UK. Facts about carers 2019. 2019.  
4 [https://www.carersuk.org/images/Facts\\_about\\_Carers\\_2019.pdf](https://www.carersuk.org/images/Facts_about_Carers_2019.pdf)  
5 20 Ordnance Survey. OS Open UPRN. [https://www.ordnancesurvey.co.uk/business-](https://www.ordnancesurvey.co.uk/business-government/products/open-uprn)  
6 [government/products/open-uprn](https://www.ordnancesurvey.co.uk/business-government/products/open-uprn) (accessed 13 Oct 2021).  
7 21 Santos F, Conti S, Wolters AT. A novel method for identifying care home residents in  
8 England: a validation study. *Int J Popul Data Sci* 2021;**5**.  
9 22 Soong J, Poots AJ, Scott S, *et al*. Developing and validating a risk prediction model  
10 for acute care based on frailty syndromes Data source. Published Online First: 2015.  
11 doi:10.1136/bmjopen-2015-008457  
12 23 Soong J, Poots AJ, Scott S, *et al*. Quantifying the prevalence of frailty in English  
13 hospitals. *BMJ Open* 2015;**5**. doi:10.1136/bmjopen-2015-008456  
14 24 Hawkey LC, Cacioppo JT. Loneliness matters: a theoretical and empirical review of  
15 consequences and mechanisms. *Ann Behav Med* 2010;**40**:218–27.  
16 doi:10.1007/s12160-010-9210-8  
17 25 Elixhauser A, Steiner C, Harris DR, *et al*. Comorbidity measures for use with  
18 administrative data. *Med Care* 1998;**36**:8–27. doi:10.1097/00005650-199801000-  
19 00004  
20 26 Quan H, Sundararajan V, Halfon P, *et al*. Coding algorithms for defining comorbidities  
21 in ICD-9-CM and ICD-10 administrative data. *Med Care* 2005;**43**:1130–9.  
22 doi:10.1097/01.mlr.0000182534.19832.83  
23 27 Dorning H, Davies A, Blunt I. Quality Watch - Focus on : People with mental ill health  
24 and hospital use. 2015.  
25 28 Department for Work and Pensions. Family Resources Survey 2018/2019. Published  
26 Online First:  
27 [2020.https://assets.publishing.service.gov.uk/government/uploads/system/uploads/att-](https://assets.publishing.service.gov.uk/government/uploads/system/uploads/attachment_data/file/791271/family-resources-survey-2017-18.pdf)  
28 [achment\\_data/file/791271/family-resources-survey-2017-18.pdf](https://assets.publishing.service.gov.uk/government/uploads/attachment_data/file/791271/family-resources-survey-2017-18.pdf)  
29 29 Office for National Statistics. Households by age composition and ethnicity, UK, 2018.  
30 2020.[https://www.ons.gov.uk/peoplepopulationandcommunity/birthsdeathsandmarri-](https://www.ons.gov.uk/peoplepopulationandcommunity/birthsdeathsandmarriages/families/adhocs/12005householdsbyagecompositionandethnicityuk2018)  
31 [ages/families/adhocs/12005householdsbyagecompositionandethnicityuk2018](https://www.ons.gov.uk/peoplepopulationandcommunity/birthsdeathsandmarriages/families/adhocs/12005householdsbyagecompositionandethnicityuk2018) (accessed  
32 13 Oct 2021).  
33 30 Mu C, Kecmanovic M, Hall J. Does Living Alone Confer a Higher Risk of  
34 Hospitalisation? *Econ Rec* 2015;**91**:124–38. doi:10.1111/1475-4932.12184  
35 31 Hull SA, Jones IR, Moser K. Factors influencing the attendance rate at accident and  
36 emergency departments in East London: the contributions of practice organization,  
37 population characteristics and distance. *J Heal Serv Res Policy* 1997;**2**.  
38 32 Lloyd T, Deeny SR, Steventon A. Weekend admissions may be associated with  
39 poorer recording of long-term comorbidities: A prospective study of emergency  
40 admissions using administrative data. *BMC Health Serv Res* 2018;**18**:1–12.  
41 doi:10.1186/s12913-018-3668-7  
42 33 Hollinghurst J, Housley G, Watkins A, *et al*. A comparison of two national frailty  
43 scoring systems. *Age Ageing* 2021;**50**:1208–14. doi:10.1093/ageing/afaa252  
44 34 Scobie S, Spencer J, Raleigh V. Ethnicity coding in English health service datasets.  
45 2021. [https://www.nuffieldtrust.org.uk/news-item/flawed-nhs-records-distort-our-view-](https://www.nuffieldtrust.org.uk/news-item/flawed-nhs-records-distort-our-view-of-ethnic-health-gaps-study-shows)  
46 [of-ethnic-health-gaps-study-shows](https://www.nuffieldtrust.org.uk/news-item/flawed-nhs-records-distort-our-view-of-ethnic-health-gaps-study-shows)  
47  
48  
49  
50  
51  
52  
53  
54  
55  
56  
57  
58  
59  
60

## Supplementary File 1. Inclusion and Exclusion Flow Chart. Created by the authors

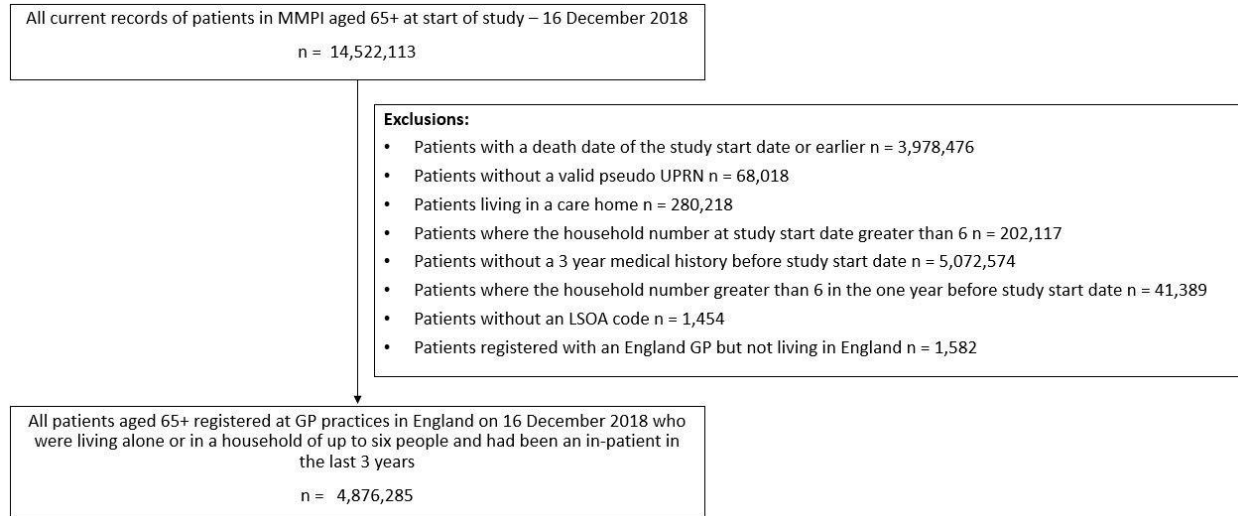

Supplementary File 2. Baseline characteristics (full list). Created by the authors

|                                       | People 65+ years living in households up to 6 people <sup>a</sup> |              |                  | People 65+ years living in households of 2 people <sup>a</sup> |                                  |                                 |
|---------------------------------------|-------------------------------------------------------------------|--------------|------------------|----------------------------------------------------------------|----------------------------------|---------------------------------|
|                                       | All                                                               | Living Alone | Not living alone | All                                                            | Living with someone with frailty | Cohabitee not recorded as frail |
| Total study population (65 years+)    | 4,876,285                                                         | 1,464,379    | 3,411,906        | 2,459,937                                                      | 255,312                          | 2,204,625                       |
| Male                                  | 47.04%                                                            | 34.02%       | 52.63%           | 52.44%                                                         | 53.84%                           | 52.28%                          |
| Age, median [IQR]                     | 75 [70, 81]                                                       | 79 [72, 85]  | 74 [69, 79]      | 74 [70, 80]                                                    | 77 [71, 83]                      | 74 [70, 80]                     |
| Number living in household, mean (SD) | 2.02 (0.99)                                                       |              |                  |                                                                |                                  |                                 |
| Ethnicity                             |                                                                   |              |                  |                                                                |                                  |                                 |
| White                                 | 80.96%                                                            | 83.06%       | 80.06%           | 82.85%                                                         | 84.64%                           | 82.64%                          |
| Mixed                                 | 0.23%                                                             | 0.23%        | 0.23%            | 0.17%                                                          | 0.16%                            | 0.17%                           |
| Asian                                 | 2.55%                                                             | 1.12%        | 3.16%            | 1.53%                                                          | 1.38%                            | 1.55%                           |
| Black                                 | 1.11%                                                             | 1.11%        | 1.11%            | 0.66%                                                          | 0.54%                            | 0.67%                           |
| Other                                 | 0.62%                                                             | 0.51%        | 0.67%            | 0.46%                                                          | 0.40%                            | 0.46%                           |
| Not stated/missing                    | 14.52%                                                            | 13.96%       | 14.76%           | 14.33%                                                         | 12.88%                           | 14.50%                          |
| Deprivation                           |                                                                   |              |                  |                                                                |                                  |                                 |
| Quintile #5 (least deprived quintile) | 23.37%                                                            | 19.71%       | 24.94%           | 26.19%                                                         | 24.52%                           | 26.38%                          |
| Quintile #4                           | 22.87%                                                            | 20.89%       | 23.72%           | 24.45%                                                         | 23.27%                           | 24.59%                          |
| Quintile #3                           | 21.29%                                                            | 20.97%       | 21.43%           | 21.51%                                                         | 21.22%                           | 21.54%                          |
| Quintile #2                           | 17.68%                                                            | 19.63%       | 16.84%           | 16.08%                                                         | 17.03%                           | 15.96%                          |
| Quintile #1 (most deprived quintile)  | 14.80%                                                            | 18.80%       | 13.08%           | 11.77%                                                         | 13.95%                           | 11.52%                          |
| Rural location                        | 22.27%                                                            | 19.08%       | 23.64%           | 25.04%                                                         | 22.56%                           | 25.32%                          |
| Region                                |                                                                   |              |                  |                                                                |                                  |                                 |
| East Midlands                         | 8.94%                                                             | 8.70%        | 9.04%            | 9.57%                                                          | 9.18%                            | 9.62%                           |

|                                                        |             |             |             |             |             |             |
|--------------------------------------------------------|-------------|-------------|-------------|-------------|-------------|-------------|
| East of England                                        | 11.69%      | 11.34%      | 11.84%      | 12.23%      | 11.61%      | 12.30%      |
| London                                                 | 10.07%      | 10.04%      | 10.09%      | 7.51%       | 7.93%       | 7.46%       |
| North East                                             | 5.51%       | 6.02%       | 5.28%       | 5.61%       | 6.03%       | 5.57%       |
| North West                                             | 14.10%      | 14.65%      | 13.86%      | 13.85%      | 15.13%      | 13.70%      |
| South East                                             | 17.00%      | 16.57%      | 17.19%      | 17.36%      | 17.04%      | 17.40%      |
| South West                                             | 11.89%      | 11.58%      | 12.02%      | 12.66%      | 12.11%      | 12.72%      |
| West Midlands                                          | 10.62%      | 10.45%      | 10.69%      | 10.61%      | 10.64%      | 10.61%      |
| Yorkshire and The Humber                               | 10.19%      | 10.65%      | 9.99%       | 10.59%      | 10.33%      | 10.62%      |
| Diagnosis history (previous three years)               |             |             |             |             |             |             |
| No. frailty syndromes, mean (SD) <sup>b</sup>          | 0.36 (0.76) | 0.51 (0.90) | 0.30 (0.68) | 0.29 (0.67) | 0.40 (0.80) | 0.28 (0.65) |
| No. Elixhauser conditions, mean (SD) <sup>b</sup>      | 2.07 (1.90) | 2.30 (1.99) | 1.97 (1.85) | 1.95 (1.83) | 2.22 (1.96) | 1.92 (1.81) |
| Frailty (1+ frailty related syndrome) <sup>b</sup>     | 24.69%      | 32.72%      | 21.24%      | 21.05%      | 26.90%      | 20.37%      |
| Multimorbidity (2+ Elixhauser conditions) <sup>b</sup> | 53.83%      | 58.93%      | 51.64%      | 51.15%      | 57.09%      | 50.46%      |
| History of mental ill health                           | 21.19%      | 26.18%      | 19.05%      | 18.30%      | 22.27%      | 17.84%      |
| History of serious mental ill health                   | 0.72%       | 1.18%       | 0.52%       | 0.48%       | 0.60%       | 0.47%       |
| Elixhauser conditions (previous three years)           |             |             |             |             |             |             |
| Alcohol abuse                                          | 2.70%       | 3.29%       | 2.45%       | 2.36%       | 2.69%       | 2.32%       |
| Blood loss anaemia                                     | 0.12%       | 0.15%       | 0.10%       | 0.10%       | 0.12%       | 0.10%       |
| Deficiency anaemia                                     | 5.50%       | 6.65%       | 5.01%       | 4.84%       | 5.95%       | 4.71%       |
| Cardiac arrhythmias                                    | 18.93%      | 21.61%      | 17.77%      | 18.14%      | 21.53%      | 17.75%      |
| Coagulopathy                                           | 0.90%       | 0.92%       | 0.90%       | 0.89%       | 0.95%       | 0.88%       |
| Depression                                             | 5.89%       | 7.71%       | 5.11%       | 4.97%       | 6.46%       | 4.80%       |
| Diabetes, complicated                                  | 2.12%       | 2.20%       | 2.09%       | 1.90%       | 2.24%       | 1.86%       |
| Diabetes, uncomplicated                                | 15.85%      | 16.04%      | 15.76%      | 14.84%      | 16.76%      | 14.62%      |



|                                                   |        |        |        |        |        |        |
|---------------------------------------------------|--------|--------|--------|--------|--------|--------|
| Drug abuse                                        | 0.11%  | 0.18%  | 0.09%  | 0.07%  | 0.10%  | 0.07%  |
| Fluid/electrolyte disorders                       | 7.44%  | 9.82%  | 6.42%  | 6.22%  | 7.96%  | 6.01%  |
| Hypertension, complicated                         | 0.25%  | 0.26%  | 0.24%  | 0.23%  | 0.25%  | 0.22%  |
| Hypertension, uncomplicated                       | 52.18% | 55.71% | 50.66% | 50.42% | 54.70% | 49.93% |
| Hypothyroidism                                    | 8.37%  | 10.17% | 7.60%  | 7.64%  | 8.40%  | 7.56%  |
| Liver disease                                     | 2.30%  | 2.39%  | 2.26%  | 2.17%  | 2.33%  | 2.15%  |
| Lymphoma                                          | 0.97%  | 0.88%  | 1.01%  | 1.03%  | 1.04%  | 1.03%  |
| Obesity                                           | 7.88%  | 7.19%  | 8.18%  | 7.92%  | 8.12%  | 7.90%  |
| Other neurological disorders                      | 4.26%  | 4.64%  | 4.10%  | 4.11%  | 4.88%  | 4.02%  |
| Peptic ulcer disease excl. bleeding               | 1.54%  | 1.63%  | 1.50%  | 1.46%  | 1.63%  | 1.44%  |
| Psychoses                                         | 0.42%  | 0.76%  | 0.27%  | 0.24%  | 0.32%  | 0.23%  |
| Pulmonary circulation disorders                   | 1.85%  | 2.20%  | 1.71%  | 1.69%  | 1.86%  | 1.67%  |
| Peripheral vascular disease                       | 4.96%  | 5.41%  | 4.76%  | 4.78%  | 5.74%  | 4.66%  |
| Renal failure                                     | 9.99%  | 12.51% | 8.91%  | 8.90%  | 11.31% | 8.62%  |
| Rheumatoid arthritis / collagen vascular diseases | 5.57%  | 6.30%  | 5.26%  | 5.38%  | 5.94%  | 5.31%  |
| Solid tumour without metastasis                   | 7.30%  | 6.62%  | 7.59%  | 7.78%  | 7.89%  | 7.77%  |
| Valvular disease                                  | 6.90%  | 8.05%  | 6.40%  | 6.46%  | 7.72%  | 6.32%  |
| Weight loss                                       | 2.54%  | 2.99%  | 2.34%  | 2.27%  | 2.96%  | 2.20%  |
| Congestive heart failure                          | 7.15%  | 8.99%  | 6.36%  | 6.24%  | 8.04%  | 6.04%  |
| Chronic pulmonary disease                         | 19.67% | 21.65% | 18.82% | 18.49% | 20.95% | 18.21% |
| Hemiplegia or paraplegia                          | 1.18%  | 1.34%  | 1.11%  | 1.05%  | 1.28%  | 1.03%  |
| Metastatic solid tumour / metastatic cancer       | 2.07%  | 1.89%  | 2.15%  | 2.17%  | 1.99%  | 2.19%  |
| Frailty syndromes (previous three years)          |        |        |        |        |        |        |
| Anxiety or depression                             | 8.51%  | 10.93% | 7.46%  | 7.36%  | 9.14%  | 7.16%  |
| Cognitive impairment                              | 7.14%  | 9.95%  | 5.93%  | 5.80%  | 8.52%  | 5.49%  |

|                                                                            |                |                |                |                |                |             |
|----------------------------------------------------------------------------|----------------|----------------|----------------|----------------|----------------|-------------|
| Functional dependence                                                      | 1.32%          | 2.27%          | 0.91%          | 0.89%          | 1.57%          | 0.81%       |
| Fall or significant fracture                                               | 11.80%         | 17.11%         | 9.52%          | 9.54%          | 12.65%         | 9.18%       |
| Incontinence                                                               | 1.78%          | 2.44%          | 1.50%          | 1.45%          | 2.00%          | 1.38%       |
| Mobility problems                                                          | 4.24%          | 6.31%          | 3.35%          | 3.25%          | 4.80%          | 3.07%       |
| Pressure ulcers                                                            | 1.36%          | 2.14%          | 1.03%          | 1.00%          | 1.47%          | 0.94%       |
| Other conditions predictive of emergency admissions (previous three years) |                |                |                |                |                |             |
| Miscellaneous cognitive dysfunction                                        | 6.35%          | 8.73%          | 5.33%          | 5.21%          | 6.97%          | 5.01%       |
| Cerebral vascular disease                                                  | 6.73%          | 8.33%          | 6.04%          | 5.97%          | 7.44%          | 5.80%       |
| Dementia                                                                   | 3.09%          | 3.96%          | 2.72%          | 2.63%          | 4.05%          | 2.47%       |
| Myocardial infarction                                                      | 9.19%          | 9.59%          | 9.02%          | 8.91%          | 10.89%         | 8.68%       |
| Any hospital usage (previous 12 months) <sup>b</sup>                       |                |                |                |                |                |             |
| A&E attendance <sup>b</sup>                                                | 34.50%         | 39.42%         | 32.38%         | 31.73%         | 36.68%         | 31.15%      |
| Emergency admission <sup>b</sup>                                           | 24.39%         | 29.48%         | 22.20%         | 21.81%         | 26.26%         | 21.29%      |
| Chronic ACS emergency admission <sup>b</sup>                               | 3.61%          | 4.48%          | 3.24%          | 3.14%          | 4.00%          | 3.04%       |
| Acute ACS emergency admission <sup>b</sup>                                 | 6.07%          | 7.62%          | 5.40%          | 5.22%          | 6.92%          | 5.03%       |
| Rates of hospital usage (previous 12 months), mean (SD)                    |                |                |                |                |                |             |
| A&E attendances                                                            | 0.61<br>(1.27) | 0.74<br>(1.50) | 0.56<br>(1.16) | 0.54<br>(1.14) | 0.67<br>(1.30) | 0.53 (1.11) |
| Emergency admissions                                                       | 0.38<br>(0.88) | 0.48<br>(1.01) | 0.34<br>(0.81) | 0.33<br>(0.80) | 0.42<br>(0.93) | 0.32 (0.79) |
| Chronic ACS emergency admissions                                           | 0.05<br>(0.28) | 0.06<br>(0.32) | 0.04<br>(0.26) | 0.04<br>(0.26) | 0.05<br>(0.29) | 0.04 (0.25) |
| Acute ACS emergency admissions                                             | 0.08<br>(0.36) | 0.10<br>(0.42) | 0.07<br>(0.33) | 0.06<br>(0.32) | 0.09<br>(0.38) | 0.06 (0.31) |

<sup>a</sup>Study population consisted of all people aged 65 years or older, registered at GP practices in England on 1 December 2018 and living in England, with a valid pseudonymized UPRN, not living in a care home, living in a household of 6 people or fewer, and with at least one hospital admission in the previous three years.

<sup>b</sup>Not adjusted for in the main analysis.

Supplementary File 3: Subgroup analyses: interaction results (a) living alone and deprivation and b) living with someone with frailty and gender. Created by the authors

|                                                                | A&E attendance |                | P value for interaction term | Emergency admissions |                | P value for interaction term |
|----------------------------------------------------------------|----------------|----------------|------------------------------|----------------------|----------------|------------------------------|
|                                                                | Rate ratio     | 95%CI          |                              | Rate ratio           | 95%CI          |                              |
| <b>Living alone<sup>a</sup></b>                                |                |                |                              |                      |                |                              |
| Living alone, IMD quintile 5 (least deprived, reference group) | 1.11           | (1.10 to 1.11) |                              | 1.17                 | (1.15 to 1.18) |                              |
| Living alone, IMD quintile 4                                   | 1.09           | (1.08 to 1.10) | 0.012                        | 1.14                 | (1.13 to 1.16) | 0.009                        |
| Living alone, IMD quintile 3                                   | 1.11           | (1.10 to 1.12) | 0.548                        | 1.17                 | (1.15 to 1.18) | 0.993                        |
| Living alone, IMD quintile 2                                   | 1.09           | (1.08 to 1.10) | 0.005                        | 1.14                 | (1.13 to 1.15) | 0.001                        |
| Living alone, IMD quintile 1 (most deprived)                   | 1.07           | (1.06 to 1.08) | <0.001                       | 1.10                 | (1.09 to 1.11) | <0.001                       |
| <b>Living with someone with frailty<sup>b</sup></b>            |                |                |                              |                      |                |                              |
| Living with someone with frailty, female (reference group)     | 1.08           | (1.07 to 1.10) |                              | 1.10                 | (1.09 to 1.12) |                              |
| Living with someone with frailty, male                         | 1.10           | (1.09 to 1.11) | 0.101                        | 1.09                 | (1.08 to 1.11) | 0.297                        |

<sup>a</sup>Adjusted for covariates listed in supplementary file 2, and interaction term for living alone and quintiles of deprivation.

<sup>b</sup>Adjusted for covariates listed in supplementary file 2, and interaction term for living with someone with frailty and gender.

Supplementary File 4. Sensitivity analyses: study population limited to individuals whose household composition did not change over the study period, and not adjusting for history of emergency hospital use. Created by the authors

|                                                                                                                                                               | N         | Rate ratio | 95%CI          | P value |
|---------------------------------------------------------------------------------------------------------------------------------------------------------------|-----------|------------|----------------|---------|
| <b>Living alone: study population limited to individuals whose household composition did not change over the study period<sup>a</sup></b>                     |           |            |                |         |
| A&E attendances                                                                                                                                               | 4,601,533 | 1.06       | (1.06 to 1.07) | <0.001  |
| Emergency admissions                                                                                                                                          | 4,601,533 | 1.10       | (1.09 to 1.10) | <0.001  |
| <b>Living alone: not adjusting for history of emergency hospital use<sup>b</sup></b>                                                                          |           |            |                |         |
| A&E attendances                                                                                                                                               | 4,876,285 | 1.11       | (1.11 to 1.12) | <0.001  |
| Emergency admissions                                                                                                                                          | 4,876,285 | 1.16       | (1.15 to 1.16) | <0.001  |
| <b>Living with someone with frailty: study population limited to individuals whose household composition did not change over the study period<sup>a</sup></b> |           |            |                |         |
| A&E attendances <sup>c</sup>                                                                                                                                  | 2,266,187 | 1.08       | (1.07 to 1.09) | <0.001  |
| Emergency admissions <sup>c</sup>                                                                                                                             | 2,266,187 | 1.08       | (1.07 to 1.09) | <0.001  |
| <b>Living with someone with frailty: not adjusting for history of emergency hospital use<sup>b</sup></b>                                                      |           |            |                |         |
| A&E attendances <sup>d</sup>                                                                                                                                  | 2,459,937 | 1.11       | (1.10 to 1.12) | <0.001  |
| Emergency admissions <sup>d</sup>                                                                                                                             | 2,459,937 | 1.11       | (1.10 to 1.12) | <0.001  |

<sup>a</sup>Adjusted for covariates listed in Supplementary File 2.

<sup>b</sup>Adjusted for covariates listed in Supplementary File 2 excluding emergency hospital use in the 12 months prior to analysis period.

<sup>c</sup>Note: A&E attendances: rate ratio 1.083 (95% CI 1.075 to 1.092). Emergency admissions: rate ratio 1.081 (95% CI 1.070 to 1.093).

<sup>d</sup>Note: A&E attendances: rate ratio 1.110 (95% CI 1.101 to 1.118). Emergency admissions: rate ratio 1.111 (95% CI 1.100 to 1.123).

STROBE Statement—Checklist of items that should be included in reports of *cohort studies*

|                              | Item No | Recommendation                                                                                                                                                                                                                                                                                                         | Page No                             |
|------------------------------|---------|------------------------------------------------------------------------------------------------------------------------------------------------------------------------------------------------------------------------------------------------------------------------------------------------------------------------|-------------------------------------|
| <b>Title and abstract</b>    | 1       | (a) Indicate the study's design with a commonly used term in the title or the abstract                                                                                                                                                                                                                                 | 1                                   |
|                              |         | (b) Provide in the abstract an informative and balanced summary of what was done and what was found                                                                                                                                                                                                                    | 2                                   |
| <b>Introduction</b>          |         |                                                                                                                                                                                                                                                                                                                        |                                     |
| Background/rationale         | 2       | Explain the scientific background and rationale for the investigation being reported                                                                                                                                                                                                                                   | 3                                   |
| Objectives                   | 3       | State specific objectives, including any prespecified hypotheses                                                                                                                                                                                                                                                       | 3-4                                 |
| <b>Methods</b>               |         |                                                                                                                                                                                                                                                                                                                        |                                     |
| Study design                 | 4       | Present key elements of study design early in the paper                                                                                                                                                                                                                                                                | 4-5                                 |
| Setting                      | 5       | Describe the setting, locations, and relevant dates, including periods of recruitment, exposure, follow-up, and data collection                                                                                                                                                                                        | 4-5                                 |
| Participants                 | 6       | (a) Give the eligibility criteria, and the sources and methods of selection of participants. Describe methods of follow-up<br>(b) For matched studies, give matching criteria and number of exposed and unexposed                                                                                                      | 4-5                                 |
| Variables                    | 7       | Clearly define all outcomes, exposures, predictors, potential confounders, and effect modifiers. Give diagnostic criteria, if applicable                                                                                                                                                                               | 4-5                                 |
| Data sources/<br>measurement | 8*      | For each variable of interest, give sources of data and details of methods of assessment (measurement). Describe comparability of assessment methods if there is more than one group                                                                                                                                   | 4-5                                 |
| Bias                         | 9       | Describe any efforts to address potential sources of bias                                                                                                                                                                                                                                                              | 9-10, 12-13                         |
| Study size                   | 10      | Explain how the study size was arrived at                                                                                                                                                                                                                                                                              | 4, 6,<br>Supplementary<br>File 1    |
| Quantitative variables       | 11      | Explain how quantitative variables were handled in the analyses. If applicable, describe which groupings were chosen and why                                                                                                                                                                                           | 4-5                                 |
| Statistical methods          | 12      | (a) Describe all statistical methods, including those used to control for confounding<br>(b) Describe any methods used to examine subgroups and interactions<br>(c) Explain how missing data were addressed<br>(d) If applicable, explain how loss to follow-up was addressed<br>(e) Describe any sensitivity analyses | 4-6                                 |
| <b>Results</b>               |         |                                                                                                                                                                                                                                                                                                                        |                                     |
| Participants                 | 13*     | (a) Report numbers of individuals at each stage of study—eg numbers potentially eligible, examined for eligibility, confirmed eligible, included in the study, completing follow-up, and analysed<br>(b) Give reasons for non-participation at each stage<br>(c) Consider use of a flow diagram                        | 6,<br>Supplementary<br>File 1       |
| Descriptive data             | 14*     | (a) Give characteristics of study participants (eg demographic, clinical, social) and information on exposures and potential confounders<br>(b) Indicate number of participants with missing data for each variable of interest<br>(c) Summarise follow-up time (eg, average and total amount)                         | 6-9,<br>Supplementary<br>File 1 & 2 |

|              |     |                                                                |      |
|--------------|-----|----------------------------------------------------------------|------|
| Outcome data | 15* | Report numbers of outcome events or summary measures over time | 9-10 |
|--------------|-----|----------------------------------------------------------------|------|

For peer review only

|    |                          |    |                                                                                                                                                                                                              |                               |
|----|--------------------------|----|--------------------------------------------------------------------------------------------------------------------------------------------------------------------------------------------------------------|-------------------------------|
| 1  | Main results             | 16 | (a) Give unadjusted estimates and, if applicable, confounder-adjusted estimates and their precision (eg, 95% confidence interval). Make clear which confounders were adjusted for and why they were included | 5, 9-10, Supplementary File 2 |
| 2  |                          |    | (b) Report category boundaries when continuous variables were categorized                                                                                                                                    |                               |
| 3  |                          |    | (c) If relevant, consider translating estimates of relative risk into absolute risk for a meaningful time period                                                                                             |                               |
| 4  |                          |    |                                                                                                                                                                                                              |                               |
| 5  |                          |    |                                                                                                                                                                                                              |                               |
| 6  |                          |    |                                                                                                                                                                                                              |                               |
| 7  |                          |    |                                                                                                                                                                                                              |                               |
| 8  |                          |    |                                                                                                                                                                                                              |                               |
| 9  | Other analyses           | 17 | Report other analyses done—eg analyses of subgroups and interactions, and sensitivity analyses                                                                                                               | 10-11                         |
| 10 |                          |    |                                                                                                                                                                                                              |                               |
| 11 | <b>Discussion</b>        |    |                                                                                                                                                                                                              |                               |
| 12 |                          |    |                                                                                                                                                                                                              |                               |
| 13 | Key results              | 18 | Summarise key results with reference to study objectives                                                                                                                                                     | 11-12                         |
| 14 | Limitations              | 19 | Discuss limitations of the study, taking into account sources of potential bias or imprecision. Discuss both direction and magnitude of any potential bias                                                   | 12-13                         |
| 15 |                          |    |                                                                                                                                                                                                              |                               |
| 16 | Interpretation           | 20 | Give a cautious overall interpretation of results considering objectives, limitations, multiplicity of analyses, results from similar studies, and other relevant evidence                                   | 11-12                         |
| 17 |                          |    |                                                                                                                                                                                                              |                               |
| 18 |                          |    |                                                                                                                                                                                                              |                               |
| 19 | Generalisability         | 21 | Discuss the generalisability (external validity) of the study results                                                                                                                                        | 12                            |
| 20 |                          |    |                                                                                                                                                                                                              |                               |
| 21 | <b>Other information</b> |    |                                                                                                                                                                                                              |                               |
| 22 | Funding                  | 22 | Give the source of funding and the role of the funders for the present study and, if applicable, for the original study on which the present article is based                                                | 13                            |
| 23 |                          |    |                                                                                                                                                                                                              |                               |
| 24 |                          |    |                                                                                                                                                                                                              |                               |

25  
26 \*Give information separately for exposed and unexposed groups.

27  
28 **Note:** An Explanation and Elaboration article discusses each checklist item and gives methodological background and  
29 published examples of transparent reporting. The STROBE checklist is best used in conjunction with this article (freely  
30 available on the Web sites of PLoS Medicine at <http://www.plosmedicine.org/>, Annals of Internal Medicine at  
31 <http://www.annals.org/>, and Epidemiology at <http://www.epidem.com/>). Information on the STROBE Initiative is  
32 available at <http://www.strobe-statement.org>.  
33  
34  
35  
36  
37  
38  
39  
40  
41  
42  
43  
44  
45  
46  
47  
48  
49  
50  
51  
52  
53  
54  
55  
56  
57  
58  
59  
60



# BMJ Open

**Association between household context and emergency hospital use in older people: a retrospective cohort study on indicators for people living alone or living with somebody with frailty, developed from routine healthcare data in England**

|                                 |                                                                                                                                                                                                                                                                                                                                                                                                                                                 |
|---------------------------------|-------------------------------------------------------------------------------------------------------------------------------------------------------------------------------------------------------------------------------------------------------------------------------------------------------------------------------------------------------------------------------------------------------------------------------------------------|
| Journal:                        | <i>BMJ Open</i>                                                                                                                                                                                                                                                                                                                                                                                                                                 |
| Manuscript ID                   | bmjopen-2021-059371.R1                                                                                                                                                                                                                                                                                                                                                                                                                          |
| Article Type:                   | Original research                                                                                                                                                                                                                                                                                                                                                                                                                               |
| Date Submitted by the Author:   | 23-Mar-2022                                                                                                                                                                                                                                                                                                                                                                                                                                     |
| Complete List of Authors:       | Lloyd, Therese; The Health Foundation, Improvement Analytics Unit<br>Crellin, Elizabeth; The Health Foundation, Improvement Analytics Unit<br>Brine, Richard; The Health Foundation, Improvement Analytics Unit<br>Shen, Julia Y.; The Health Foundation, Improvement Analytics Unit;<br>London School of Hygiene and Tropical Medicine Faculty of Public Health and Policy<br>Wolters, Arne; The Health Foundation, Improvement Analytics Unit |
| <b>Primary Subject Heading</b>: | Health policy                                                                                                                                                                                                                                                                                                                                                                                                                                   |
| Secondary Subject Heading:      | Health informatics                                                                                                                                                                                                                                                                                                                                                                                                                              |
| Keywords:                       | Health policy < HEALTH SERVICES ADMINISTRATION & MANAGEMENT, Health informatics < BIOTECHNOLOGY & BIOINFORMATICS, PREVENTIVE MEDICINE, PUBLIC HEALTH                                                                                                                                                                                                                                                                                            |
|                                 |                                                                                                                                                                                                                                                                                                                                                                                                                                                 |

SCHOLARONE™  
Manuscripts



I, the Submitting Author has the right to grant and does grant on behalf of all authors of the Work (as defined in the below author licence), an exclusive licence and/or a non-exclusive licence for contributions from authors who are: i) UK Crown employees; ii) where BMJ has agreed a CC-BY licence shall apply, and/or iii) in accordance with the terms applicable for US Federal Government officers or employees acting as part of their official duties; on a worldwide, perpetual, irrevocable, royalty-free basis to BMJ Publishing Group Ltd ("BMJ") its licensees and where the relevant Journal is co-owned by BMJ to the co-owners of the Journal, to publish the Work in this journal and any other BMJ products and to exploit all rights, as set out in our [licence](#).

The Submitting Author accepts and understands that any supply made under these terms is made by BMJ to the Submitting Author unless you are acting as an employee on behalf of your employer or a postgraduate student of an affiliated institution which is paying any applicable article publishing charge ("APC") for Open Access articles. Where the Submitting Author wishes to make the Work available on an Open Access basis (and intends to pay the relevant APC), the terms of reuse of such Open Access shall be governed by a Creative Commons licence – details of these licences and which [Creative Commons](#) licence will apply to this Work are set out in our licence referred to above.

Other than as permitted in any relevant BMJ Author's Self Archiving Policies, I confirm this Work has not been accepted for publication elsewhere, is not being considered for publication elsewhere and does not duplicate material already published. I confirm all authors consent to publication of this Work and authorise the granting of this licence.

1  
2  
3  
4 **Association between household context and emergency**  
5  
6 **hospital use in older people: a retrospective cohort study on**  
7  
8 **indicators for people living alone or living with somebody with**  
9  
10 **frailty, developed from routine healthcare data in England**  
11  
12  
13  
14  
15  
16  
17  
18

19 Therese Lloyd\*, Improvement Analytics Unit, The Health Foundation, 8 Salisbury Square,  
20 London, EC4Y 8AP, UK, [Therese.Lloyd@health.org.uk](mailto:Therese.Lloyd@health.org.uk), tel: 020 7257 2090

21 Elizabeth Crellin, Improvement Analytics Unit, The Health Foundation, 8 Salisbury Square,  
22 London, EC4Y 8AP, UK, [Liz.Crellin@health.org.uk](mailto:Liz.Crellin@health.org.uk)

23 Richard Brine, Improvement Analytics Unit, The Health Foundation, 8 Salisbury Square,  
24 London, EC4Y 8AP, UK, [Richard.Brine@health.org.uk](mailto:Richard.Brine@health.org.uk)

25 Julia Y. Shen, Improvement Analytics Unit, The Health Foundation, 8 Salisbury Square,  
26 London, EC4Y 8AP, UK, [Julia.Shen@health.org.uk](mailto:Julia.Shen@health.org.uk)

27 Arne T. Wolters, Improvement Analytics Unit, The Health Foundation, 8 Salisbury Square,  
28 London, EC4Y 8AP, UK, [Arne.Wolters@health.org.uk](mailto:Arne.Wolters@health.org.uk)

29 \*Corresponding author  
30  
31  
32  
33  
34  
35  
36  
37  
38  
39  
40  
41  
42  
43  
44  
45  
46  
47  
48  
49  
50  
51  
52  
53  
54  
55  
56  
57  
58  
59  
60

**Keywords:** population health management, social determinants of health, social isolation, health data linkage, secondary care

Word count (main text): 4029

## ABSTRACT

**Objectives:** To derive two household context factors, living alone and living in a two-person household with a person who is frail, from routine administrative health data and to assess their association with emergency hospital use in people aged 65 or over.

**Design:** Retrospective cohort study using national pseudonymised hospital data and pseudonymised address data derived from a minimised version of the Master Patient Index, a central database of all patient registrations in England.

**Setting:** England-wide.

**Participants:** 4,876,285 people aged 65 years or older registered at GP practices in England on 16 December 2018 who were living alone or in a household of up to six people, and with at least one hospital admission in the last three years.

**Outcomes:** Rates of emergency department (A&E) attendance and inpatient emergency admissions over a one-year follow-up period.

**Results:** Older people living alone had higher rates of A&E attendances (adjusted rate ratio 1.09, 95% CI 1.09 to 1.10) and emergency admissions (1.14, 95% CI 1.14 to 1.15) than older people living in households of 2-6 people. Older people living with someone with frailty in a two-person household had higher rates of A&E attendance (adjusted rate ratio 1.09, 95% CI 1.08 to 1.10) and emergency admissions (1.10, 95% CI 1.09 to 1.11) than other older people living in a two-person household.

**Conclusions:** We show that household context factors can be derived from linked routine administrative health data and that these are strongly associated with higher emergency hospital use in older people. Using household context factors can improve analyses, as well as support in the understanding of local population needs and in population health management.

## STRENGTHS AND LIMITATIONS OF THIS STUDY

- Two household context factors, living alone and living with someone with frailty, were derived from pseudonymised routinely collected data; this created valuable additional patient-level information without the need to collect new data.
- National data from approximately 4.9 million people aged 65 or over was used to examine the association of the household context factors and emergency hospital use.
- The analysis adjusted for common demographic and clinical factors predictive of emergency hospital use.
- The study was restricted to individuals aged 65 or over who had a hospital admission in the previous three years, limiting the generalisability of our study.

## INTRODUCTION

The 'social determinants of health'[1] – social context factors outside of the health and social care system that affect a person's health, such as social networks (eg family and friends), housing, education and employment opportunities – have long been recognised in the UK [2,3] and globally.

There is some evidence that a person's social context informs care: Stokes et al found that when identifying patients for multidisciplinary teams (MDTs), medical practitioners felt that the patients' needs were often primarily related to socio-economic factors such as isolation, poor housing or living arrangements, and other issues.[4] Some MDTs are aiming to address social, as well as health, needs.[5] Others are even specifically targeting people with non-clinical needs, with the aim of addressing social needs which might otherwise lead to deteriorating health and escalating medical needs.[6]

However, unlike other risks observed by clinicians that are included in population health management tools,[7] social context is not routinely captured in NHS or social care datasets, and where these are collected, they are often recorded in free text fields. Information on patients' circumstances is therefore not readily retrievable from electronic health records. This has implications not only for hospital staff but also analysts, commissioners or policy makers, who often rely on these data when analysing, planning or commissioning care.

The national health service (NHS) in England holds a central database of all patient registrations in England, which includes their address details. By assigning a Unique Property Reference Number (UPRN) to each address and pseudonymising the UPRN, it is possible to derive information on household composition while maintaining people's anonymity. This information can be used to create some important household context factors that may affect health and health outcomes, for example living alone or living with someone with frailty.

Living alone is a risk factor for social isolation and may therefore be a marker of social isolation.[8,9] Social isolation reflects a lack of personal ties, social integration or sense of community[10] and has been found to be associated with both increased morbidity and mortality.[8, 11] There are different groups of people at risk of social isolation, not least young people leaving home for the first time. However, older people may be at greater risk of social isolation as a result of loss of physical or mental ability, or deaths of close family and friends.[11] Living alone does not necessarily mean someone is socially isolated; for example, approximately one-third of people aged 65 or over live on their own[12] but many may have friends or family living nearby. However, living alone has been found to be associated with higher emergency (unplanned) hospital use within one GP practice in South East London,[13] indicating that living alone still signals important social context at population level and warrants further investigation. Living alone may also have a detrimental effect on a person's mobility, nutrition and medication compliance.[9,14]

Living with someone with frailty may imply informal care responsibilities. Informally caring for somebody else can have a detrimental effect on a person's own physical and mental health.[15–17] Informal carers may not only feel socially isolated,[11] but may also suffer from lack of sleep and neglect their own health and personal wellbeing,[18,19] or have difficulty accessing care.[20] A large England-wide survey of informal carers found they had

1  
2  
3 worse health-related quality of life, with a disproportionate burden for already-marginalised  
4 groups.[20] According to the 2011 Census, 1.3 million (14%) people aged 65 or over living in  
5 households in England and Wales provided unpaid care in 2011, many of whom provided 50  
6 hours or more unpaid care weekly.[21] There may now be over 2 million people aged 65 or  
7 older who are carers, with a significant proportion of carers aged 85 and over caring for  
8 someone with multiple needs, often including dementia.[22]  
9

10  
11 In this paper we demonstrate the value of deriving two household context factors from  
12 routinely collected address data: a) living alone, and b) living with one other person who is  
13 frail. We explore the association between these factors and emergency hospital use in  
14 people aged 65 or over, as this population is at particular risk of both emergency hospital  
15 admission and isolation.  
16

## 17 **METHODS**

### 18 **Data sources and linkage**

19  
20 We accessed a minimised version of the Master Patient Index (MMPI), a health dataset  
21 based on English GP registration data. This dataset included individuals' gender, month and  
22 year of birth (and death where applicable), lower super output area (LSOA) and  
23 pseudonymised UPRNs. UPRNs are the official unique identifier of every spatial address in  
24 Great Britain[23] and were applied to each address location in the MMPI and  
25 pseudonymised by our data suppliers. We did not have access to actual patient addresses.  
26 Building on our previous work to identify care home residents from UPRNs,[24] we also  
27 accessed a flag to indicate if a property was a care home. The individual's LSOA was used  
28 to link to small area statistics provided by the Office for National Statistics on socio-  
29 economic deprivation, rurality and geographical region.  
30  
31  
32  
33

### 34 **Study population and outcomes**

35  
36 Our study population consisted of all people aged 65 years or older registered at GP  
37 practices in England on 16 December 2018 who were living alone or in a household of up to  
38 six people. Household size was limited to six in order to exclude people living in  
39 establishments, as their care provision may differ from that of a single household. This  
40 restriction excluded less than 2% of households.[12] We excluded individuals without a valid  
41 pseudonymised UPRN or living in care homes at the study start date, and those living at  
42 properties containing seven or more people at any time in the year prior to the study start.  
43 People not admitted to hospital in the previous three years were also excluded, as hospital  
44 records were used to identify long-term conditions and ethnicities (Supplementary File 1).  
45  
46  
47

48 Where both individuals in a two-person household were aged 65 or older, both were  
49 included in the study population and contributed to the analysis. If one household member  
50 was under 65, this member was not included in the study population but did contribute to  
51 defining the household context of their cohabitee.  
52  
53

54 Using a common pseudonymised NHS number, we linked the MMPI data to Secondary  
55 Uses Service [SUS] hospital data from the previous three years. For any individual aged 65  
56 or over with linked hospital records we identified their long-term conditions, secondary care  
57 use and top-level ethnicity (based on the mode of ethnicities recorded).  
58  
59  
60

1  
2  
3 The maximum follow-up period (study length) was one year unless censored because the  
4 person died, moved into a care home or their household composition changed.  
5

6 We examined rates of emergency department (A&E) attendance and inpatient emergency  
7 admissions in the follow-up period.  
8

### 9 **Household context factors**

10  
11 A person was defined as living alone if there was no other person with the same UPRN  
12 during the study period. For individuals living in two-person households we also linked the  
13 hospital records of their cohabitee, where these existed, to identify if the individual was living  
14 with someone recorded as frail. A person was identified as frail if they had any of the  
15 conditions or events in Soong et al's list of syndromes[25,26] coded in inpatient records in  
16 the previous three years. These include cognitive impairment, mobility problems and  
17 pressure ulcers, which may require care or support from the cohabitee.  
18  
19

### 20 **Statistical methods**

21  
22 We used multivariable regression to examine the association between emergency health  
23 care use (emergency department attendances and emergency hospital admissions,  
24 respectively) and a) living alone and b) living with someone with frailty. We did this by  
25 comparing living alone to living in a household of two to six people and, separately,  
26 comparing living in a two-person household with a person with frailty to living in a two-person  
27 household where the cohabitee was not recorded as frail.  
28  
29

30  
31 We ran both crude and adjusted analyses. Adjusted analyses included age, gender,  
32 ethnicity, geographical region (nine areas of England), socio-economic deprivation (Index of  
33 Multiple Deprivation – IMD – quintiles), rural/urban classification, historic emergency hospital  
34 use in the last twelve months (including emergency admissions for chronic ambulatory care  
35 sensitive and acute urgent care sensitive conditions), and a range of long-term conditions  
36 recorded in the previous three years. These conditions included frailty indicators,[25,26]  
37 history of mental or serious mental ill-health,[27] and other conditions predictive of  
38 emergency hospital use [28,29] (see Supplementary File 2 for full list of covariates). We  
39 aimed to include as covariates as many variables as possible without overparametrising the  
40 model in order to remove any known confounding. We used a negative binomial model as  
41 the data was overdispersed. Rate ratios were produced to interpret the results.  
42  
43  
44

### 45 **Subgroup analysis**

46  
47 We investigated whether the emergency hospital use of people living with someone with  
48 frailty differed depending on if they were male or female, as women in general provide more  
49 informal care than men.[30] We also investigated whether the emergency hospital use of  
50 people living alone differed according to their local deprivation quintile, as this may affect a  
51 person's access to informal or formal care (neither of which is observable in our data).  
52 Differences in the rate ratios between population subgroups were examined by fitting a  
53 multivariable regression model including an interaction term between the household context  
54 factor and the population segment.  
55  
56

### 57 **Sensitivity analysis**



1  
2  
3 In the main analyses people were censored at the time their household composition  
4 changed. There is a risk that that household change could be driven by deteriorating health,  
5 for example if a person living alone had worsening illness and moved into a care home. This  
6 would underestimate a person's health care needs if they had continued living alone.  
7 Therefore, a sensitivity analysis examined only those whose household composition  
8 remained stable, ie did not change over the year.  
9

10  
11 The main analyses adjusted for, among other covariates, emergency hospital use in the  
12 twelve months prior to the analysis period, as these variables may reflect the clinical severity  
13 of a patient's condition(s), which can be difficult to deduce from electronic health records.  
14 However, prior hospital use may also be affected by past household context factors (e.g.  
15 living alone or living with somebody with frailty), potentially underestimating the effect of  
16 these household context variables. Therefore, we performed sensitivity analyses omitting  
17 prior hospital use covariates.  
18

### 19 20 **Patient and public involvement**

21  
22 We sought input from a patient representative at the development stage, including on choice  
23 and relevance of household context factors. There was further engagement with this  
24 same and another representative on the interpretation of results and on an early draft of the  
25 paper.  
26  
27

## 28 29 **RESULTS**

### 30 31 **Study populations**

32  
33 After applying the inclusion and exclusion criteria, there were 4,876,285 people aged over  
34 65, registered with an English GP and living in England, with at least one hospital admission  
35 in the last three years and living in a household of up to six people (Supplementary File 1).  
36 The largest exclusion was due to no hospital admission in the previous three years  
37 (approximately 5m). Of the remaining individuals, 1,464,379 (30.03%) lived alone and  
38 2,459,937 (50.45%) lived in a two-person household (Table 1).  
39

40  
41 People living alone were more often female (66% vs 47%) and on average older (median  
42 age 79 vs 74) compared with people living in households of 2-6 people (Table 1,  
43 Supplementary File 2). They also lived in more deprived areas; 19% lived in the most  
44 deprived quintile compared to 13% of individuals living in households of 2-6 people.  
45 Furthermore, more people living alone were frail (33% vs 21%, with on average 0.51 vs 0.30  
46 frailty syndromes) and they had higher levels of multimorbidity (on average 2.30 vs 1.97  
47 conditions) compared with people in households of 2-6 people. They also had greater  
48 numbers of A&E attendance and emergency admissions in the twelve months prior to our  
49 study period (0.74 vs 0.56 and 0.48 vs 0.34, respectively) than people in households of 2-6  
50 people.  
51  
52

53  
54 Among people aged 65 or over living in two-person households, people living with someone  
55 with frailty had a median age of 77, compared with 74 for people living with a cohabitee who  
56 was not recorded as frail (Table 1, Supplementary File 2). 54% (vs 52%) were male and  
57 14% (vs 12%) lived in the most deprived quintile. People living with someone with frailty  
58 were on average themselves more likely to be frail (27% vs 20%), with on average 0.40 (vs  
59 0.28) frailty syndromes, and had more long-term conditions (2.22 vs 1.92). They also had  
60

1  
2  
3 greater rates of A&E attendance and emergency admissions in the twelve months prior (0.67  
4 vs 0.53 and 0.42 vs 0.32, respectively) compared with people living with a cohabitee who  
5 was not recorded as frail.  
6  
7  
8  
9  
10  
11  
12  
13  
14  
15  
16  
17  
18  
19  
20  
21  
22  
23  
24  
25  
26  
27  
28  
29  
30  
31  
32  
33  
34  
35  
36  
37  
38  
39  
40  
41  
42  
43  
44  
45  
46  
47  
48  
49  
50  
51  
52  
53  
54  
55  
56  
57  
58  
59  
60

For peer review only

**Table 1. Baseline characteristics**

|                                                         | People 65+ years living in households up to 6 people* |              |                  | People 65+ years living in households of 2 people* |                                  |                                 |
|---------------------------------------------------------|-------------------------------------------------------|--------------|------------------|----------------------------------------------------|----------------------------------|---------------------------------|
|                                                         | All                                                   | Living Alone | Not living alone | All                                                | Living with someone with frailty | Cohabitee not recorded as frail |
| Total study population (65 years+)                      | 4,876,285                                             | 1,464,379    | 3,411,906        | 2,459,937                                          | 255,312                          | 2,204,625                       |
| Male                                                    | 47.04%                                                | 34.02%       | 52.63%           | 52.44%                                             | 53.84%                           | 52.28%                          |
| Age, median [IQR]                                       | 75 [70, 81]                                           | 79 [72, 85]  | 74 [69, 79]      | 74 [70, 80]                                        | 77 [71, 83]                      | 74 [70, 80]                     |
| Ethnicity                                               |                                                       |              |                  |                                                    |                                  |                                 |
| White                                                   | 80.96%                                                | 83.06%       | 80.06%           | 82.85%                                             | 84.64%                           | 82.64%                          |
| Mixed                                                   | 0.23%                                                 | 0.23%        | 0.23%            | 0.17%                                              | 0.16%                            | 0.17%                           |
| Asian                                                   | 2.55%                                                 | 1.12%        | 3.16%            | 1.53%                                              | 1.38%                            | 1.55%                           |
| Black                                                   | 1.11%                                                 | 1.11%        | 1.11%            | 0.66%                                              | 0.54%                            | 0.67%                           |
| Other                                                   | 0.62%                                                 | 0.51%        | 0.67%            | 0.46%                                              | 0.40%                            | 0.46%                           |
| Not stated/missing                                      | 14.52%                                                | 13.96%       | 14.76%           | 14.33%                                             | 12.88%                           | 14.50%                          |
| Deprivation                                             |                                                       |              |                  |                                                    |                                  |                                 |
| Quintile #5 (least deprived quintile)                   | 23.37%                                                | 19.71%       | 24.94%           | 26.19%                                             | 24.52%                           | 26.38%                          |
| Quintile #4                                             | 22.87%                                                | 20.89%       | 23.72%           | 24.45%                                             | 23.27%                           | 24.59%                          |
| Quintile #3                                             | 21.29%                                                | 20.97%       | 21.43%           | 21.51%                                             | 21.22%                           | 21.54%                          |
| Quintile #2                                             | 17.68%                                                | 19.63%       | 16.84%           | 16.08%                                             | 17.03%                           | 15.96%                          |
| Quintile #1 (most deprived quintile)                    | 14.80%                                                | 18.80%       | 13.08%           | 11.77%                                             | 13.95%                           | 11.52%                          |
| Rural location                                          | 22.27%                                                | 19.08%       | 23.64%           | 25.04%                                             | 22.56%                           | 25.32%                          |
| Diagnosis history (previous three years)                |                                                       |              |                  |                                                    |                                  |                                 |
| No. frailty syndromes, mean (SD)                        | 0.36 (0.76)                                           | 0.51 (0.90)  | 0.30 (0.68)      | 0.29 (0.67)                                        | 0.40 (0.80)                      | 0.28 (0.65)                     |
| No. Elixhauser conditions, mean (SD)                    | 2.07 (1.90)                                           | 2.30 (1.99)  | 1.97 (1.85)      | 1.95 (1.83)                                        | 2.22 (1.96)                      | 1.92 (1.81)                     |
| Frailty (1+ frailty related syndrome)                   | 24.69%                                                | 32.72%       | 21.24%           | 21.05%                                             | 26.90%                           | 20.37%                          |
| Multimorbidity (2+ Elixhauser conditions)               | 53.83%                                                | 58.93%       | 51.64%           | 51.15%                                             | 57.09%                           | 50.46%                          |
| History of mental ill health                            | 21.19%                                                | 26.18%       | 19.05%           | 18.30%                                             | 22.27%                           | 17.84%                          |
| Rates of hospital usage (previous 12 months), mean (SD) |                                                       |              |                  |                                                    |                                  |                                 |
| A&E attendances                                         | 0.61 (1.27)                                           | 0.74 (1.50)  | 0.56 (1.16)      | 0.54 (1.14)                                        | 0.67 (1.30)                      | 0.53 (1.11)                     |

|                      | People 65+ years living in households up to 6 people* |                |                  | People 65+ years living in households of 2 people* |                                  |                                 |
|----------------------|-------------------------------------------------------|----------------|------------------|----------------------------------------------------|----------------------------------|---------------------------------|
|                      | All                                                   | Living Alone   | Not living alone | All                                                | Living with someone with frailty | Cohabitee not recorded as frail |
| Emergency admissions | 0.38<br>(0.88)                                        | 0.48<br>(1.01) | 0.34<br>(0.81)   | 0.33<br>(0.80)                                     | 0.42<br>(0.93)                   | 0.32<br>(0.79)                  |

For more baseline characteristics, please see Supplementary File 2.

\*Study population consisted of all people aged 65 years or older, registered at GP practices in England on 16 December 2018 and living in England, with a valid pseudonymised UPRN, not living in a care home, living in a household of 6 people or fewer, and with at least one hospital admission in the previous three years.

### Statistical analysis

People aged 65 or over living alone had on average 0.78 A&E attendances per person per year in the follow-up period, compared with 0.56 for people living in households of 2-6 people. They had on average 0.51 emergency admissions per person per year, compared with 0.33 for people living in households of 2-6 people (Table 2). Without adjusting for baseline characteristics, people living alone had substantially higher rates of A&E attendance (unadjusted rate ratio 1.44, 95% confidence interval (CI) 1.43 to 1.44) than people living in households of 2-6 people (Table 3). They also had higher rates of emergency admissions (unadjusted rate ratio 1.60, 95% CI 1.60 to 1.61).

**Table 2. Crude rates of secondary use (number of events per person per year)**

|                                    | People 65+ years living in households up to 6 people |             |                  |             | People 65+ years living in households of 2 people |             |                                 |             |
|------------------------------------|------------------------------------------------------|-------------|------------------|-------------|---------------------------------------------------|-------------|---------------------------------|-------------|
|                                    | Living alone                                         |             | Not living alone |             | Living with someone with frailty                  |             | Cohabitee not recorded as frail |             |
| Outcomes over the follow-up period | Events                                               | Crude rate* | Events           | Crude rate* | Events                                            | Crude rate* | Events                          | Crude rate* |
| Total number people                | 1,464,379                                            |             | 3,411,906        |             | 255,312                                           |             | 2,204,625                       |             |
| Person-years of follow up          | 1,359,094                                            |             | 3,251,440        |             | 226,373                                           |             | 2,077,846                       |             |
| A&E attendances                    | 1,062,731                                            | 0.78        | 1,818,519        | 0.56        | 157,137                                           | 0.69        | 1,102,683                       | 0.53        |
| Emergency admissions               | 692,345                                              | 0.51        | 1,073,870        | 0.33        | 98,584                                            | 0.44        | 654,784                         | 0.32        |

\*Number of events per person, per year.

After adjusting for baseline characteristics, we found that people living alone still had statistically significantly higher rates of A&E attendances (adjusted rate ratio 1.09, 95% CI 1.09 to 1.10) and emergency admissions (1.14, 95% CI 1.14 to 1.15, Table 3).

People living with someone with frailty had on average 0.69 A&E attendances per person per year, compared with 0.53 for people living in two-person households where the cohabitee was not recorded as frail. They had on average 0.44 emergency admissions per person per year, compared with 0.32 for people living in two-person households where the cohabitee was not recorded as frail (Table 2). Without adjusting for baseline characteristics, people living with someone with frailty had substantially higher rates of A&E attendances (unadjusted rate ratio 1.33, 95% CI 1.32 to 1.34) and emergency admissions (unadjusted rate ratio 1.42, 95% CI 1.41 to 1.44) than the comparison population (Table 3). After adjusting for baseline characteristics, people living with someone with frailty in a two-person household still had statistically significantly higher rates of both A&E attendance (adjusted rate ratio 1.09, 95% CI 1.08 to 1.10) and emergency admissions (1.10, 95% CI 1.09 to 1.11, Table 3).

**Table 3. Results of unadjusted and adjusted regression models**

|                                         | Unadjusted model |                |         | Adjusted model |                |         |
|-----------------------------------------|------------------|----------------|---------|----------------|----------------|---------|
|                                         | Rate ratio       | 95%CI          | P value | Rate ratio     | 95% CI         | P value |
| <b>Living alone</b>                     |                  |                |         |                |                |         |
| A&E attendances                         | 1.44             | (1.43 to 1.44) | <0.001  | 1.09           | (1.09 to 1.10) | <0.001  |
| Emergency admissions                    | 1.60             | (1.60 to 1.61) | <0.001  | 1.14           | (1.14 to 1.15) | <0.001  |
| <b>Living with someone with frailty</b> |                  |                |         |                |                |         |
| A&E attendances                         | 1.33             | (1.32 to 1.34) | <0.001  | 1.09           | (1.08 to 1.10) | <0.001  |
| Emergency admissions                    | 1.42             | (1.41 to 1.44) | <0.001  | 1.10           | (1.09 to 1.11) | <0.001  |

Adjusted models included as covariates gender, age, deprivation, ethnicity, geographical region, rural location, history of a range of diagnoses in previous three years and historic emergency hospital use in the last 12 months (covariates listed in Supplementary File 2).

## Subgroup analysis

Gender

1  
2  
3 There was no evidence that the adjusted rate ratio for A&E attendances or emergency  
4 admissions was statistically significantly different depending on if the person who was living  
5 with somebody with frailty was male or female (interaction test  $p=0.101$  and  $p=0.297$ ,  
6 respectively, Supplementary File 3).  
7

#### 8 Level of deprivation 9

10  
11 There was a statistically significant difference in the rate ratios of living alone for different  
12 levels of deprivation compared with the least deprived quintile (interaction tests  $p<0.02$ ) in all  
13 but the third quintile (i.e. the middle group). While people living alone had higher rates of  
14 emergency hospital use than those not living alone in each of the five IMD quintiles, the rate  
15 ratio for the association between living alone and A&E attendances was lowest in the most  
16 deprived quintile (adjusted rate ratio 1.07, 95% CI 1.06 to 1.08) and highest in the least  
17 deprived quintile (adjusted rate ratio 1.11, 95% CI 1.10 to 1.11). Similarly, for emergency  
18 admissions, it varied between 1.10 (95% CI 1.09 to 1.11) in the most deprived quintile and  
19 1.17 (95% CI 1.15 to 1.18) in the least deprived quintile (Supplementary File 3). In other  
20 words, the association between living alone and increased hospitalisation was stronger for  
21 less deprived groups.  
22  
23

#### 24 Sensitivity analysis 25

##### 26 Stable household composition only 27

28  
29 Limiting the study population to individuals whose household composition did not change  
30 over the year, the adjusted rate ratio for living alone compared with households of 2-6  
31 people for A&E attendance was 1.06 (95% CI 1.06 to 1.07); for emergency admissions this  
32 was 1.10 (95% CI 1.09 to 1.10), (Supplementary File 4). For the analysis of living with  
33 someone with frailty, the adjusted rate ratio for A&E attendance was 1.08 (95% CI 1.07 to  
34 1.09) and for emergency admissions 1.08 (95% CI 1.07 to 1.09).  
35  
36

##### 37 Omitting covariates on prior emergency hospital use 38

39  
40 Adjusting for baseline characteristics excluding prior emergency hospital use, the adjusted  
41 rate ratio for A&E attendance was 1.11 (95% CI 1.11 to 1.12) and for emergency admissions  
42 1.16 (95% CI 1.15 to 1.16) (Supplementary File 4). For the analysis of living with someone  
43 with frailty in a two-person household, the adjusted rate ratio for A&E attendance was 1.11  
44 (95% CI 1.10 to 1.12) and for emergency admissions 1.11 (95% CI 1.10 to 1.12).  
45  
46

## 47 DISCUSSION 48

49 Our analysis showed that both living alone and living with somebody with frailty are strongly  
50 associated with higher emergency hospital use in the one-year follow-up period. We found  
51 that differences in demographic characteristics and underlying health conditions explain  
52 most of this association; however, even after adjusting for baseline demographic and clinical  
53 characteristics, people living alone attend A&E 9% more often and are admitted to hospital  
54 in an emergency 14% more often than those living with others. Similarly, individuals living  
55 with someone who has frailty attend A&E 9% more often and are admitted to hospital as an  
56 emergency 10% more often than others in a two-person household. It is important to note  
57 that although older people living alone may be at higher risk of social isolation, this is an  
58 imperfect proxy at best. For example, an individual residing alone may have a rich social  
59 network of family and friends and/or have access to formal or informal care; routine  
60

1  
2  
3 administrative data cannot capture these nuances. Similarly, individuals living in a two-  
4 person household with someone with frailty may have access to formal or informal support  
5 and care. Furthermore, this analysis does not provide insight into the mechanism by which  
6 these two household factors affect individuals' emergency health care needs.  
7

8  
9 Nevertheless, we have found a strong association between these two factors and  
10 emergency hospital use, even after correcting for other factors predictive of hospital use.  
11 This indicates that these metrics are picking up on an additional health care need that is not  
12 explained by commonly known predictors, such as prior hospital use or frailty.  
13

14 Ideally a person's support needs should be assessed individually and in person, especially  
15 for their clinical management. However, this analysis demonstrates how existing  
16 administrative data can be used to derive household context factors that can be used in the  
17 absence of such information being recorded. These household context factors could improve  
18 population risk algorithms, budget models, or initial service eligibility criteria. For instance,  
19 these factors could be used to help identify populations for targeted anticipatory care  
20 initiatives such as MDTs that may be able to mitigate some social as well as medical risk  
21 factors to prevent later deteriorating health or hospitalisation.  
22  
23

24 Household context factors can also contribute to more robust research and evaluation by  
25 allowing for the adjustment of previously unobserved characteristics affecting health care  
26 outcomes, thereby decreasing the risk of bias in analyses.  
27  
28

29 This analysis found that, although higher levels of deprivation are associated with higher  
30 emergency hospital use, the interaction between level of deprivation and living alone was  
31 counterintuitive: individuals living alone in the most deprived areas had a lower increase in  
32 hospitalisation rates (compared with those not living alone in similar areas) than individuals  
33 living alone in the least deprived areas. It is not possible to determine from our analyses why  
34 this may be. It may be that there are differences in health-seeking behaviours, or different  
35 access to formal or informal care outside of the household, which in turn could lead to either  
36 more (if identifying need) or less (if addressing need) emergency hospital use. Qualitative  
37 research is needed to understand the mechanisms behind these results, and to provide  
38 context and nuance.  
39  
40

## 41 **Strengths and limitations**

42  
43 While prior studies on living alone or informal carers have used survey or local data, this  
44 analysis uses routinely collected national data from approximately 4.9m people aged 65 or  
45 over, thereby providing robust findings. Through accessing other routine data collections, the  
46 analysis could control for common demographic and clinical factors predictive of emergency  
47 hospital use, including many long-term conditions. However, the study population was  
48 restricted to people in England aged 65 and over, who were admitted to hospital in the three  
49 years prior to our analysis. Although this allowed for the derivation of pre-existing conditions  
50 from previous hospital records, our analysis is restricted to people that are older and sicker  
51 compared with the overall population, limiting the generalisability of our findings.  
52 Furthermore, the analysis was restricted to households of up to 6 people, in order to exclude  
53 communal establishments such as care home or prisons. Excluding households of 7 or more  
54 people will likely disproportionately exclude people from certain ethnic backgrounds, who  
55 more often have multigenerational households.[31]  
56  
57  
58  
59  
60



1  
2  
3 Our findings are nonetheless broadly consistent with other studies that have previously  
4 found strong links between older people living alone and their emergency hospital  
5 use.[13,32,33] To our knowledge, there are no statistical studies on living with someone with  
6 frailty, although results are broadly consistent with the literature on informal carers. A study  
7 on multimorbidity within households found inconsistent results of cohabittees' multimorbidity  
8 status on emergency hospital use.[16]  
9

10  
11 The household context factors were derived from address information collected by general  
12 practices in England. For these to be accurate, address information needs to be up to date.  
13 Anecdotal evidence suggests that address information is typically well recorded, particularly  
14 for the older population, but this could not be validated.  
15

16  
17 Individuals' health conditions derived from hospital admission records may be underreported  
18 [34] and therefore not fully adjusted for in analysis. In particular, frailty may be underreported  
19 [25] or reported differently to general practice.[35] If some individuals who have a cohabitee  
20 with frailty were misclassified, the association with emergency hospital use was potentially  
21 underestimated. IMD quintiles are based on an individual's local neighbourhood and may not  
22 reflect an individual's economic circumstances. Ethnicity was derived from hospital records,  
23 the best available source for large-scale linkage. However, SUS has known limitations:  
24 minority ethnic groups are under-represented compared with national census, there are  
25 substantial records with a code of 'not stated', 'not known' and 'other', and these are not  
26 uniformly distributed across ethnic groups.[36] SUS data does not include all mental health  
27 trust activity; therefore emergency admissions for mental health issues may be  
28 underreported.  
29

30  
31 The study only looks at hospital use over a one-year period due to data constraints.  
32 Although this allows for an accurate reflection of the population, and accounts for  
33 seasonality, the impact of household context may have materialised either earlier or later  
34 than the study period, and so would ideally have been estimated from a long-term cohort.  
35  
36

### 37 **Future work**

38  
39 Other household context factors can be developed using the UPRNs derived from GP  
40 registration data, including recent bereavement, recent change to living alone, moving into a  
41 care home or multiple moves within a given period, which may be a proxy for unstable  
42 housing.  
43  
44

## 45 **CONCLUSION**

46  
47 This study shows 'proof of concept' that nationally collected and pseudonymised address  
48 data can be used to determine household context factors that provide important and useful  
49 information to understand patients' health and care needs, while maintaining patient  
50 confidentiality. In particular, living in a two-person household with someone with frailty is a  
51 novel indicator, which has not previously been developed or analysed.  
52  
53

54 Both living alone and living with a person with frailty were shown to be strongly associated  
55 with higher emergency hospital use, underlining the importance of these household context  
56 factors in understanding individuals' health risk and the potential to harness these data for  
57 identifying individuals for targeted interventions like MDTs. Informal carers, who play a  
58 critical role in our health and social care system, are often overlooked; these analyses add to  
59 the evidence that it is crucial to provide support to this group, as well as those living alone.  
60



1  
2  
3 Although other research, particularly on living alone, shows similar links, this is, to our  
4 knowledge, the first time that an analysis on routine data on a national scale has been used.  
5

6 Although these metrics cannot replace a personal assessment of an individual's social  
7 context and support needs, our analyses demonstrate that these household context factors  
8 can be used not only to improve analyses, but also for planning, commissioning, and  
9 population health management.  
10

## 11 12 **ACKNOWLEDGMENTS**

13  
14 The authors thank Lynn Laidlaw for her input during the development stage and to  
15 her and Joanna C, both patient representatives, for their insights and comments on an  
16 early draft. We also thank Stefano Conti and Emma Vestesson for advice on the analysis,  
17 and Stephen O'Neill, Hardeep Aiden, Adam Tinson, Kathryn Marszalek and Mai Stafford for  
18 their comments on an earlier draft. This work uses data provided by patients and collected  
19 by the NHS as part of their care and support.  
20  
21

## 22 23 **FUNDING**

24  
25 JS received PhD funding from UKRI/Economic and Social Research Council.  
26

## 27 28 **COMPETING INTERESTS**

29  
30 None.  
31

## 32 33 **CONTRIBUTORS**

34  
35 TL and RB designed the study. RB derived the household context indicators and created the  
36 analysis dataset. EC performed the analysis. TL, EC, RB, JS and AW contributed to the  
37 interpretation of the work. TL, RB and EC drafted the paper; all authors revised and  
38 contributed to the paper. All authors read and approved the final manuscript.  
39  
40

## 41 42 **ETHICS APPROVAL**

43  
44 This study requires no ethics board approval as the analysis uses pseudonymised data  
45 transferred by the National Commissioning Data Repository to the Improvement Analytics  
46 Unit, which is a data processor on behalf of NHS England and NHS Improvement.  
47  
48

## 49 50 **DATA AVAILABILITY STATEMENT**

51  
52 No additional data are available.  
53  
54  
55  
56  
57  
58  
59  
60

## REFERENCES

- 1 The Health Foundation. Social determinants of health. <https://www.health.org.uk/topics/social-determinants-of-health> (accessed 12 Oct 2021).
- 2 Marmot M, Allen J, Goldblatt P, *et al*. Fair society, healthy lives: strategic review of health inequalities in England post-201. London: 2010. <http://www.instituteofhealthequity.org/resources-reports/fair-society-healthy-lives-the-marmot-review/fair-society-healthy-lives-full-report-pdf.pdf> (accessed 21 Jun 2018).
- 3 Marmot M, Wilkinson RG. *Social determinants of health*. 2nd ed. Oxford: : Oxford University Press 2005.
- 4 Stokes J, Riste L, Cheraghi-Sohi S. Targeting the 'right' patients for integrated care: Stakeholder perspectives from a qualitative study. *J Heal Serv Res Policy* 2018;**23**:243–51. doi:10.1177/1355819618788100
- 5 Stokes J, Panagioti M, Alam R, *et al*. Effectiveness of Case Management for 'At Risk' Patients in Primary Care: A Systematic Review and Meta-Analysis. *PLoS One* 2015;**10**:e0132340. doi:10.1371/journal.pone.0132340
- 6 Brown S. Qualitative evaluation of South Warwickshire Place Based Teams. 2021.
- 7 Lewis G, Curry N, Bardsley M. Choosing a predictive risk model : a guide for commissioners in England. 2011;:20.
- 8 Holt-Lunstad J, Smith TB, Baker M, *et al*. Loneliness and Social Isolation as Risk Factors for Mortality: A Meta-Analytic Review. *Perspect Psychol Sci* 2015;**10**:227–37. doi:10.1177/1745691614568352
- 9 Bucholz EM, Rathore SS, Gosch K, *et al*. Effect of living alone on patient outcomes after hospitalization for acute myocardial infarction. *Am J Cardiol* 2011;**108**:943–8. doi:10.1016/j.amjcard.2011.05.023
- 10 Hawkley LC, Cacioppo JT. Loneliness matters: a theoretical and empirical review of consequences and mechanisms. *Ann Behav Med* 2010;**40**:218–27. doi:10.1007/s12160-010-9210-8
- 11 Aiden H. Isolation and Loneliness: An overview of the literature. 2016. <https://www.redcross.org.uk/-/media/documents/about-us/research-publications/health-and-social-care/co-op-isolation-loneliness-overview.pdf>
- 12 Sanders S. Families and households in the UK: 2019. 2019. <https://www.ons.gov.uk/peoplepopulationandcommunity/birthsdeathsandmarriages/families/datasets/familiesandhouseholds>
- 13 Dreyer K, Steventon A, Fisher R, *et al*. The association between living alone and health care utilisation in older adults : a retrospective cohort study of electronic health records from a London general practice. 2018;:15–7. doi:10.1186/s12877-018-0939-4
- 14 Bucholz EM, Krumholz HM. Loneliness and living alone: What are we really measuring? *Arch Intern Med* 2012;**29**:997–1003. doi:10.1016/j.biotechadv.2011.08.021.Secreted
- 15 Bom J, Bakx P, Schut F, *et al*. The Impact of Informal Caregiving for Older Adults on the Health of Various Types of Caregivers: A Systematic Review. *Gerontologist* 2019;**59**:e629–42. doi:10.1093/geront/gny137
- 16 Stafford M, Deeny SR, Dreyer K, *et al*. Multiple long-term conditions within households and use of health and social care: a retrospective cohort study. *BJGP Open* 2021;**5**:1–14. doi:10.3399/BJGPO.2020.0134
- 17 Carers UK. State of Caring 2018. 2018. <https://www.carersuk.org/for-professionals/policy/policy-library/state-of-caring-2018-2>
- 18 Vasileiou K, Barnett J, Barreto M, *et al*. Experiences of loneliness associated with being an informal caregiver: A qualitative investigation. *Front Psychol* 2017;**8**:1–11. doi:10.3389/fpsyg.2017.00585
- 19 Harding R, Epiphaniou E, Hamilton D, *et al*. What are the perceived needs and challenges of informal caregivers in home cancer palliative care? Qualitative data to construct a feasible psycho-educational intervention. *Support Care Cancer* 2012;**20**:1975–82. doi:10.1007/s00520-011-1300-z

- 1  
2  
3 20 Thomas GPA, Saunders CL, Roland MO, *et al.* Informal carers' health-related quality  
4 of life and patient experience in primary care: Evidence from 195,364 carers in  
5 England responding to a national survey. *BMC Fam Pract* 2015;**16**:14–21.  
6 doi:10.1186/s12875-015-0277-y
- 7 21 Office for National Statistics. What does the 2011 Census tell us about older people.  
8 2013. <https://www.ons.gov.uk/peoplepopulationandcommunity/birthsdeathsandmarriages/ageing/articles/whatdoesthe2011censustellusaboutolderpeople/2013-09-06>  
9 (accessed 13 Oct 2021).
- 10 22 Carers UK. Facts about carers 2019. 2019.  
11 [https://www.carersuk.org/images/Facts\\_about\\_Carers\\_2019.pdf](https://www.carersuk.org/images/Facts_about_Carers_2019.pdf)
- 12 23 Ordnance Survey. OS Open UPRN. [https://www.ordnancesurvey.co.uk/business-](https://www.ordnancesurvey.co.uk/business-government/products/open-uprn)  
13 [government/products/open-uprn](https://www.ordnancesurvey.co.uk/business-government/products/open-uprn) (accessed 13 Oct 2021).
- 14 24 Santos F, Conti S, Wolters AT. A novel method for identifying care home residents in  
15 England: a validation study. *Int J Popul Data Sci* 2021;**5**.
- 16 25 Soong J, Poots AJ, Scott S, *et al.* Developing and validating a risk prediction model  
17 for acute care based on frailty syndromes Data source. Published Online First: 2015.  
18 doi:10.1136/bmjopen-2015-008457
- 19 26 Soong J, Poots AJ, Scott S, *et al.* Quantifying the prevalence of frailty in English  
20 hospitals. *BMJ Open* 2015;**5**. doi:10.1136/bmjopen-2015-008456
- 21 27 Dorning H, Davies A, Blunt I. Quality Watch - Focus on : People with mental ill health  
22 and hospital use. 2015.
- 23 28 Elixhauser A, Steiner C, Harris DR, *et al.* Comorbidity measures for use with  
24 administrative data. *Med Care* 1998;**36**:8–27. doi:10.1097/00005650-199801000-  
25 00004
- 26 29 Quan H, Sundararajan V, Halfon P, *et al.* Coding algorithms for defining comorbidities  
27 in ICD-9-CM and ICD-10 administrative data. *Med Care* 2005;**43**:1130–9.  
28 doi:10.1097/01.mlr.0000182534.19832.83
- 29 30 Department for Work and Pensions. Family Resources Survey 2018/2019. Published  
30 Online First:  
31 2020. [https://assets.publishing.service.gov.uk/government/uploads/system/uploads/att-](https://assets.publishing.service.gov.uk/government/uploads/system/uploads/attachment_data/file/791271/family-resources-survey-2017-18.pdf)  
32 [achment\\_data/file/791271/family-resources-survey-2017-18.pdf](https://assets.publishing.service.gov.uk/government/uploads/system/uploads/attachment_data/file/791271/family-resources-survey-2017-18.pdf)
- 33 31 Office for National Statistics. Households by age composition and ethnicity, UK, 2018.  
34 2020. <https://www.ons.gov.uk/peoplepopulationandcommunity/birthsdeathsandmarriages/families/adhocs/12005householdsbyagecompositionandethnicityuk2018> (accessed  
35 13 Oct 2021).
- 36 32 Mu C, Kecmanovic M, Hall J. Does Living Alone Confer a Higher Risk of  
37 Hospitalisation? *Econ Rec* 2015;**91**:124–38. doi:10.1111/1475-4932.12184
- 38 33 Hull SA, Jones IR, Moser K. Factors influencing the attendance rate at accident and  
39 emergency departments in East London: the contributions of practice organization,  
40 population characteristics and distance. *J Heal Serv Res Policy* 1997;**2**.
- 41 34 Lloyd T, Deeny SR, Steventon A. Weekend admissions may be associated with  
42 poorer recording of long-term comorbidities: A prospective study of emergency  
43 admissions using administrative data. *BMC Health Serv Res* 2018;**18**:1–12.  
44 doi:10.1186/s12913-018-3668-7
- 45 35 Hollinghurst J, Housley G, Watkins A, *et al.* A comparison of two national frailty  
46 scoring systems. *Age Ageing* 2021;**50**:1208–14. doi:10.1093/ageing/afaa252
- 47 36 Scobie S, Spencer J, Raleigh V. Ethnicity coding in English health service datasets.  
48 2021. [https://www.nuffieldtrust.org.uk/news-item/flawed-nhs-records-distort-our-view-](https://www.nuffieldtrust.org.uk/news-item/flawed-nhs-records-distort-our-view-of-ethnic-health-gaps-study-shows)  
49 [of-ethnic-health-gaps-study-shows](https://www.nuffieldtrust.org.uk/news-item/flawed-nhs-records-distort-our-view-of-ethnic-health-gaps-study-shows)
- 50  
51  
52  
53  
54  
55  
56  
57  
58  
59  
60

## Supplementary File 1. Inclusion and Exclusion Flow Chart. Created by the authors



Supplementary File 2. Baseline characteristics (full list). Created by the authors

|                                       | People 65+ years living in households up to 6 people <sup>a</sup> |              |                  | People 65+ years living in households of 2 people <sup>a</sup> |                                  |                                 |
|---------------------------------------|-------------------------------------------------------------------|--------------|------------------|----------------------------------------------------------------|----------------------------------|---------------------------------|
|                                       | All                                                               | Living Alone | Not living alone | All                                                            | Living with someone with frailty | Cohabitee not recorded as frail |
| Total study population (65 years+)    | 4,876,285                                                         | 1,464,379    | 3,411,906        | 2,459,937                                                      | 255,312                          | 2,204,625                       |
| Male                                  | 47.04%                                                            | 34.02%       | 52.63%           | 52.44%                                                         | 53.84%                           | 52.28%                          |
| Age, median [IQR]                     | 75 [70, 81]                                                       | 79 [72, 85]  | 74 [69, 79]      | 74 [70, 80]                                                    | 77 [71, 83]                      | 74 [70, 80]                     |
| Number living in household, mean (SD) | 2.02 (0.99)                                                       |              |                  |                                                                |                                  |                                 |
| Ethnicity                             |                                                                   |              |                  |                                                                |                                  |                                 |
| White                                 | 80.96%                                                            | 83.06%       | 80.06%           | 82.85%                                                         | 84.64%                           | 82.64%                          |
| Mixed                                 | 0.23%                                                             | 0.23%        | 0.23%            | 0.17%                                                          | 0.16%                            | 0.17%                           |
| Asian                                 | 2.55%                                                             | 1.12%        | 3.16%            | 1.53%                                                          | 1.38%                            | 1.55%                           |
| Black                                 | 1.11%                                                             | 1.11%        | 1.11%            | 0.66%                                                          | 0.54%                            | 0.67%                           |
| Other                                 | 0.62%                                                             | 0.51%        | 0.67%            | 0.46%                                                          | 0.40%                            | 0.46%                           |
| Not stated/missing                    | 14.52%                                                            | 13.96%       | 14.76%           | 14.33%                                                         | 12.88%                           | 14.50%                          |
| Deprivation                           |                                                                   |              |                  |                                                                |                                  |                                 |
| Quintile #5 (least deprived quintile) | 23.37%                                                            | 19.71%       | 24.94%           | 26.19%                                                         | 24.52%                           | 26.38%                          |
| Quintile #4                           | 22.87%                                                            | 20.89%       | 23.72%           | 24.45%                                                         | 23.27%                           | 24.59%                          |
| Quintile #3                           | 21.29%                                                            | 20.97%       | 21.43%           | 21.51%                                                         | 21.22%                           | 21.54%                          |
| Quintile #2                           | 17.68%                                                            | 19.63%       | 16.84%           | 16.08%                                                         | 17.03%                           | 15.96%                          |
| Quintile #1 (most deprived quintile)  | 14.80%                                                            | 18.80%       | 13.08%           | 11.77%                                                         | 13.95%                           | 11.52%                          |
| Rural location                        | 22.27%                                                            | 19.08%       | 23.64%           | 25.04%                                                         | 22.56%                           | 25.32%                          |
| Region                                |                                                                   |              |                  |                                                                |                                  |                                 |
| East Midlands                         | 8.94%                                                             | 8.70%        | 9.04%            | 9.57%                                                          | 9.18%                            | 9.62%                           |

|                                                        |                |                |                |                |                |             |
|--------------------------------------------------------|----------------|----------------|----------------|----------------|----------------|-------------|
| East of England                                        | 11.69%         | 11.34%         | 11.84%         | 12.23%         | 11.61%         | 12.30%      |
| London                                                 | 10.07%         | 10.04%         | 10.09%         | 7.51%          | 7.93%          | 7.46%       |
| North East                                             | 5.51%          | 6.02%          | 5.28%          | 5.61%          | 6.03%          | 5.57%       |
| North West                                             | 14.10%         | 14.65%         | 13.86%         | 13.85%         | 15.13%         | 13.70%      |
| South East                                             | 17.00%         | 16.57%         | 17.19%         | 17.36%         | 17.04%         | 17.40%      |
| South West                                             | 11.89%         | 11.58%         | 12.02%         | 12.66%         | 12.11%         | 12.72%      |
| West Midlands                                          | 10.62%         | 10.45%         | 10.69%         | 10.61%         | 10.64%         | 10.61%      |
| Yorkshire and The Humber                               | 10.19%         | 10.65%         | 9.99%          | 10.59%         | 10.33%         | 10.62%      |
| Diagnosis history (previous three years)               |                |                |                |                |                |             |
| No. frailty syndromes, mean (SD) <sup>b</sup>          | 0.36<br>(0.76) | 0.51<br>(0.90) | 0.30<br>(0.68) | 0.29<br>(0.67) | 0.40<br>(0.80) | 0.28 (0.65) |
| No. Elixhauser conditions, mean (SD) <sup>b</sup>      | 2.07<br>(1.90) | 2.30<br>(1.99) | 1.97<br>(1.85) | 1.95<br>(1.83) | 2.22<br>(1.96) | 1.92 (1.81) |
| Frailty (1+ frailty related syndrome) <sup>b</sup>     | 24.69%         | 32.72%         | 21.24%         | 21.05%         | 26.90%         | 20.37%      |
| Multimorbidity (2+ Elixhauser conditions) <sup>b</sup> | 53.83%         | 58.93%         | 51.64%         | 51.15%         | 57.09%         | 50.46%      |
| History of mental ill health                           | 21.19%         | 26.18%         | 19.05%         | 18.30%         | 22.27%         | 17.84%      |
| History of serious mental ill health                   | 0.72%          | 1.18%          | 0.52%          | 0.48%          | 0.60%          | 0.47%       |
| Elixhauser conditions (previous three years)           |                |                |                |                |                |             |
| Alcohol abuse                                          | 2.70%          | 3.29%          | 2.45%          | 2.36%          | 2.69%          | 2.32%       |
| Blood loss anaemia                                     | 0.12%          | 0.15%          | 0.10%          | 0.10%          | 0.12%          | 0.10%       |
| Deficiency anaemia                                     | 5.50%          | 6.65%          | 5.01%          | 4.84%          | 5.95%          | 4.71%       |
| Cardiac arrhythmias                                    | 18.93%         | 21.61%         | 17.77%         | 18.14%         | 21.53%         | 17.75%      |
| Coagulopathy                                           | 0.90%          | 0.92%          | 0.90%          | 0.89%          | 0.95%          | 0.88%       |
| Depression                                             | 5.89%          | 7.71%          | 5.11%          | 4.97%          | 6.46%          | 4.80%       |
| Diabetes, complicated                                  | 2.12%          | 2.20%          | 2.09%          | 1.90%          | 2.24%          | 1.86%       |
| Diabetes, uncomplicated                                | 15.85%         | 16.04%         | 15.76%         | 14.84%         | 16.76%         | 14.62%      |

|                                                   |        |        |        |        |        |        |
|---------------------------------------------------|--------|--------|--------|--------|--------|--------|
| Drug abuse                                        | 0.11%  | 0.18%  | 0.09%  | 0.07%  | 0.10%  | 0.07%  |
| Fluid/electrolyte disorders                       | 7.44%  | 9.82%  | 6.42%  | 6.22%  | 7.96%  | 6.01%  |
| Hypertension, complicated                         | 0.25%  | 0.26%  | 0.24%  | 0.23%  | 0.25%  | 0.22%  |
| Hypertension, uncomplicated                       | 52.18% | 55.71% | 50.66% | 50.42% | 54.70% | 49.93% |
| Hypothyroidism                                    | 8.37%  | 10.17% | 7.60%  | 7.64%  | 8.40%  | 7.56%  |
| Liver disease                                     | 2.30%  | 2.39%  | 2.26%  | 2.17%  | 2.33%  | 2.15%  |
| Lymphoma                                          | 0.97%  | 0.88%  | 1.01%  | 1.03%  | 1.04%  | 1.03%  |
| Obesity                                           | 7.88%  | 7.19%  | 8.18%  | 7.92%  | 8.12%  | 7.90%  |
| Other neurological disorders                      | 4.26%  | 4.64%  | 4.10%  | 4.11%  | 4.88%  | 4.02%  |
| Peptic ulcer disease excl. bleeding               | 1.54%  | 1.63%  | 1.50%  | 1.46%  | 1.63%  | 1.44%  |
| Psychoses                                         | 0.42%  | 0.76%  | 0.27%  | 0.24%  | 0.32%  | 0.23%  |
| Pulmonary circulation disorders                   | 1.85%  | 2.20%  | 1.71%  | 1.69%  | 1.86%  | 1.67%  |
| Peripheral vascular disease                       | 4.96%  | 5.41%  | 4.76%  | 4.78%  | 5.74%  | 4.66%  |
| Renal failure                                     | 9.99%  | 12.51% | 8.91%  | 8.90%  | 11.31% | 8.62%  |
| Rheumatoid arthritis / collagen vascular diseases | 5.57%  | 6.30%  | 5.26%  | 5.38%  | 5.94%  | 5.31%  |
| Solid tumour without metastasis                   | 7.30%  | 6.62%  | 7.59%  | 7.78%  | 7.89%  | 7.77%  |
| Valvular disease                                  | 6.90%  | 8.05%  | 6.40%  | 6.46%  | 7.72%  | 6.32%  |
| Weight loss                                       | 2.54%  | 2.99%  | 2.34%  | 2.27%  | 2.96%  | 2.20%  |
| Congestive heart failure                          | 7.15%  | 8.99%  | 6.36%  | 6.24%  | 8.04%  | 6.04%  |
| Chronic pulmonary disease                         | 19.67% | 21.65% | 18.82% | 18.49% | 20.95% | 18.21% |
| Hemiplegia or paraplegia                          | 1.18%  | 1.34%  | 1.11%  | 1.05%  | 1.28%  | 1.03%  |
| Metastatic solid tumour / metastatic cancer       | 2.07%  | 1.89%  | 2.15%  | 2.17%  | 1.99%  | 2.19%  |
| Frailty syndromes (previous three years)          |        |        |        |        |        |        |
| Anxiety or depression                             | 8.51%  | 10.93% | 7.46%  | 7.36%  | 9.14%  | 7.16%  |
| Cognitive impairment                              | 7.14%  | 9.95%  | 5.93%  | 5.80%  | 8.52%  | 5.49%  |



|                                                                            |                |                |                |                |                |             |
|----------------------------------------------------------------------------|----------------|----------------|----------------|----------------|----------------|-------------|
| Functional dependence                                                      | 1.32%          | 2.27%          | 0.91%          | 0.89%          | 1.57%          | 0.81%       |
| Fall or significant fracture                                               | 11.80%         | 17.11%         | 9.52%          | 9.54%          | 12.65%         | 9.18%       |
| Incontinence                                                               | 1.78%          | 2.44%          | 1.50%          | 1.45%          | 2.00%          | 1.38%       |
| Mobility problems                                                          | 4.24%          | 6.31%          | 3.35%          | 3.25%          | 4.80%          | 3.07%       |
| Pressure ulcers                                                            | 1.36%          | 2.14%          | 1.03%          | 1.00%          | 1.47%          | 0.94%       |
| Other conditions predictive of emergency admissions (previous three years) |                |                |                |                |                |             |
| Miscellaneous cognitive dysfunction                                        | 6.35%          | 8.73%          | 5.33%          | 5.21%          | 6.97%          | 5.01%       |
| Cerebral vascular disease                                                  | 6.73%          | 8.33%          | 6.04%          | 5.97%          | 7.44%          | 5.80%       |
| Dementia                                                                   | 3.09%          | 3.96%          | 2.72%          | 2.63%          | 4.05%          | 2.47%       |
| Myocardial infarction                                                      | 9.19%          | 9.59%          | 9.02%          | 8.91%          | 10.89%         | 8.68%       |
| Any hospital usage (previous 12 months) <sup>b</sup>                       |                |                |                |                |                |             |
| A&E attendance <sup>b</sup>                                                | 34.50%         | 39.42%         | 32.38%         | 31.73%         | 36.68%         | 31.15%      |
| Emergency admission <sup>b</sup>                                           | 24.39%         | 29.48%         | 22.20%         | 21.81%         | 26.26%         | 21.29%      |
| Chronic ACS emergency admission <sup>b</sup>                               | 3.61%          | 4.48%          | 3.24%          | 3.14%          | 4.00%          | 3.04%       |
| Acute ACS emergency admission <sup>b</sup>                                 | 6.07%          | 7.62%          | 5.40%          | 5.22%          | 6.92%          | 5.03%       |
| Rates of hospital usage (previous 12 months), mean (SD)                    |                |                |                |                |                |             |
| A&E attendances                                                            | 0.61<br>(1.27) | 0.74<br>(1.50) | 0.56<br>(1.16) | 0.54<br>(1.14) | 0.67<br>(1.30) | 0.53 (1.11) |
| Emergency admissions                                                       | 0.38<br>(0.88) | 0.48<br>(1.01) | 0.34<br>(0.81) | 0.33<br>(0.80) | 0.42<br>(0.93) | 0.32 (0.79) |
| Chronic ACS emergency admissions                                           | 0.05<br>(0.28) | 0.06<br>(0.32) | 0.04<br>(0.26) | 0.04<br>(0.26) | 0.05<br>(0.29) | 0.04 (0.25) |
| Acute ACS emergency admissions                                             | 0.08<br>(0.36) | 0.10<br>(0.42) | 0.07<br>(0.33) | 0.06<br>(0.32) | 0.09<br>(0.38) | 0.06 (0.31) |

<sup>a</sup>Study population consisted of all people aged 65 years or older, registered at GP practices in England on 1 December 2018 and living in England, with a valid pseudonymized UPRN, not living in a care home, living in a household of 6 people or fewer, and with at least one hospital admission in the previous three years.

<sup>b</sup>Not adjusted for in the main analysis.

Supplementary File 3: Subgroup analyses: interaction results (a) living alone and deprivation and b) living with someone with frailty and gender. Created by the authors

|                                                                | A&E attendance |                |                              | Emergency admissions |                |                              |
|----------------------------------------------------------------|----------------|----------------|------------------------------|----------------------|----------------|------------------------------|
|                                                                | Rate ratio     | 95%CI          | P value for interaction term | Rate ratio           | 95%CI          | P value for interaction term |
| <b>Living alone<sup>a</sup></b>                                |                |                |                              |                      |                |                              |
| Living alone, IMD quintile 5 (least deprived, reference group) | 1.11           | (1.10 to 1.11) |                              | 1.17                 | (1.15 to 1.18) |                              |
| Living alone, IMD quintile 4                                   | 1.09           | (1.08 to 1.10) | 0.012                        | 1.14                 | (1.13 to 1.16) | 0.009                        |
| Living alone, IMD quintile 3                                   | 1.11           | (1.10 to 1.12) | 0.548                        | 1.17                 | (1.15 to 1.18) | 0.993                        |
| Living alone, IMD quintile 2                                   | 1.09           | (1.08 to 1.10) | 0.005                        | 1.14                 | (1.13 to 1.15) | 0.001                        |
| Living alone, IMD quintile 1 (most deprived)                   | 1.07           | (1.06 to 1.08) | <0.001                       | 1.10                 | (1.09 to 1.11) | <0.001                       |
| <b>Living with someone with frailty<sup>b</sup></b>            |                |                |                              |                      |                |                              |
| Living with someone with frailty, female (reference group)     | 1.08           | (1.07 to 1.10) |                              | 1.10                 | (1.09 to 1.12) |                              |
| Living with someone with frailty, male                         | 1.10           | (1.09 to 1.11) | 0.101                        | 1.09                 | (1.08 to 1.11) | 0.297                        |

<sup>a</sup>Adjusted for covariates listed in supplementary file 2, and interaction term for living alone and quintiles of deprivation.

<sup>b</sup>Adjusted for covariates listed in supplementary file 2, and interaction term for living with someone with frailty and gender.

Supplementary File 4. Sensitivity analyses: study population limited to individuals whose household composition did not change over the study period, and not adjusting for history of emergency hospital use. Created by the authors

|                                                                                                                                                               | N         | Rate ratio | 95%CI          | P value |
|---------------------------------------------------------------------------------------------------------------------------------------------------------------|-----------|------------|----------------|---------|
| <b>Living alone: study population limited to individuals whose household composition did not change over the study period<sup>a</sup></b>                     |           |            |                |         |
| A&E attendances                                                                                                                                               | 4,601,533 | 1.06       | (1.06 to 1.07) | <0.001  |
| Emergency admissions                                                                                                                                          | 4,601,533 | 1.10       | (1.09 to 1.10) | <0.001  |
| <b>Living alone: not adjusting for history of emergency hospital use<sup>b</sup></b>                                                                          |           |            |                |         |
| A&E attendances                                                                                                                                               | 4,876,285 | 1.11       | (1.11 to 1.12) | <0.001  |
| Emergency admissions                                                                                                                                          | 4,876,285 | 1.16       | (1.15 to 1.16) | <0.001  |
| <b>Living with someone with frailty: study population limited to individuals whose household composition did not change over the study period<sup>a</sup></b> |           |            |                |         |
| A&E attendances <sup>c</sup>                                                                                                                                  | 2,266,187 | 1.08       | (1.07 to 1.09) | <0.001  |
| Emergency admissions <sup>c</sup>                                                                                                                             | 2,266,187 | 1.08       | (1.07 to 1.09) | <0.001  |
| <b>Living with someone with frailty: not adjusting for history of emergency hospital use<sup>b</sup></b>                                                      |           |            |                |         |
| A&E attendances <sup>d</sup>                                                                                                                                  | 2,459,937 | 1.11       | (1.10 to 1.12) | <0.001  |
| Emergency admissions <sup>d</sup>                                                                                                                             | 2,459,937 | 1.11       | (1.10 to 1.12) | <0.001  |

<sup>a</sup>Adjusted for covariates listed in Supplementary File 2.

<sup>b</sup>Adjusted for covariates listed in Supplementary File 2 excluding emergency hospital use in the 12 months prior to analysis period.

<sup>c</sup>Note: A&E attendances: rate ratio 1.083 (95% CI 1.075 to 1.092). Emergency admissions: rate ratio 1.081 (95% CI 1.070 to 1.093).

<sup>d</sup>Note: A&E attendances: rate ratio 1.110 (95% CI 1.101 to 1.118). Emergency admissions: rate ratio 1.111 (95% CI 1.100 to 1.123).

STROBE Statement—Checklist of items that should be included in reports of *cohort studies*

|                              | Item No | Recommendation                                                                                                                                                                                                                                                                                                         | Page No                             |
|------------------------------|---------|------------------------------------------------------------------------------------------------------------------------------------------------------------------------------------------------------------------------------------------------------------------------------------------------------------------------|-------------------------------------|
| <b>Title and abstract</b>    | 1       | (a) Indicate the study's design with a commonly used term in the title or the abstract                                                                                                                                                                                                                                 | 1                                   |
|                              |         | (b) Provide in the abstract an informative and balanced summary of what was done and what was found                                                                                                                                                                                                                    | 2                                   |
| <b>Introduction</b>          |         |                                                                                                                                                                                                                                                                                                                        |                                     |
| Background/rationale         | 2       | Explain the scientific background and rationale for the investigation being reported                                                                                                                                                                                                                                   | 3-4                                 |
| Objectives                   | 3       | State specific objectives, including any prespecified hypotheses                                                                                                                                                                                                                                                       | 3-4                                 |
| <b>Methods</b>               |         |                                                                                                                                                                                                                                                                                                                        |                                     |
| Study design                 | 4       | Present key elements of study design early in the paper                                                                                                                                                                                                                                                                | 4-5                                 |
| Setting                      | 5       | Describe the setting, locations, and relevant dates, including periods of recruitment, exposure, follow-up, and data collection                                                                                                                                                                                        | 4-5                                 |
| Participants                 | 6       | (a) Give the eligibility criteria, and the sources and methods of selection of participants. Describe methods of follow-up<br>(b) For matched studies, give matching criteria and number of exposed and unexposed                                                                                                      | 4-5                                 |
| Variables                    | 7       | Clearly define all outcomes, exposures, predictors, potential confounders, and effect modifiers. Give diagnostic criteria, if applicable                                                                                                                                                                               | 4-6                                 |
| Data sources/<br>measurement | 8*      | For each variable of interest, give sources of data and details of methods of assessment (measurement). Describe comparability of assessment methods if there is more than one group                                                                                                                                   | 4-5                                 |
| Bias                         | 9       | Describe any efforts to address potential sources of bias                                                                                                                                                                                                                                                              | 4-6, 10-11                          |
| Study size                   | 10      | Explain how the study size was arrived at                                                                                                                                                                                                                                                                              | 4, 6,<br>Supplementary<br>File 1    |
| Quantitative variables       | 11      | Explain how quantitative variables were handled in the analyses. If applicable, describe which groupings were chosen and why                                                                                                                                                                                           | 4-5                                 |
| Statistical methods          | 12      | (a) Describe all statistical methods, including those used to control for confounding<br>(b) Describe any methods used to examine subgroups and interactions<br>(c) Explain how missing data were addressed<br>(d) If applicable, explain how loss to follow-up was addressed<br>(e) Describe any sensitivity analyses | 4-6                                 |
| <b>Results</b>               |         |                                                                                                                                                                                                                                                                                                                        |                                     |
| Participants                 | 13*     | (a) Report numbers of individuals at each stage of study—eg numbers potentially eligible, examined for eligibility, confirmed eligible, included in the study, completing follow-up, and analysed<br>(b) Give reasons for non-participation at each stage<br>(c) Consider use of a flow diagram                        | 6,<br>Supplementary<br>File 1       |
| Descriptive data             | 14*     | (a) Give characteristics of study participants (eg demographic, clinical, social) and information on exposures and potential confounders<br>(b) Indicate number of participants with missing data for each variable of interest<br>(c) Summarise follow-up time (eg, average and total amount)                         | 6-9,<br>Supplementary<br>File 1 & 2 |

1  
2  
3  
4  
5  
6  
7  
8  
9  
10  
11  
12  
13  
14  
15  
16  
17  
18  
19  
20  
21  
22  
23  
24  
25  
26  
27  
28  
29  
30  
31  
32  
33  
34  
35  
36  
37  
38  
39  
40  
41  
42  
43  
44  
45  
46  
47  
48  
49  
50  
51  
52  
53  
54  
55  
56  
57  
58  
59  
60

|              |     |                                                                |     |
|--------------|-----|----------------------------------------------------------------|-----|
| Outcome data | 15* | Report numbers of outcome events or summary measures over time | 8-9 |
|--------------|-----|----------------------------------------------------------------|-----|

For peer review only

|    |                          |    |                                                                                                                                                                                                              |                              |
|----|--------------------------|----|--------------------------------------------------------------------------------------------------------------------------------------------------------------------------------------------------------------|------------------------------|
| 1  | Main results             | 16 | (a) Give unadjusted estimates and, if applicable, confounder-adjusted estimates and their precision (eg, 95% confidence interval). Make clear which confounders were adjusted for and why they were included | 5, 8-9, Supplementary File 2 |
| 2  |                          |    | (b) Report category boundaries when continuous variables were categorized                                                                                                                                    |                              |
| 3  |                          |    | (c) If relevant, consider translating estimates of relative risk into absolute risk for a meaningful time period                                                                                             |                              |
| 4  |                          |    |                                                                                                                                                                                                              |                              |
| 5  |                          |    |                                                                                                                                                                                                              |                              |
| 6  |                          |    |                                                                                                                                                                                                              |                              |
| 7  |                          |    |                                                                                                                                                                                                              |                              |
| 8  |                          |    |                                                                                                                                                                                                              |                              |
| 9  | Other analyses           | 17 | Report other analyses done—eg analyses of subgroups and interactions, and sensitivity analyses                                                                                                               | 9-10                         |
| 10 |                          |    |                                                                                                                                                                                                              |                              |
| 11 | <b>Discussion</b>        |    |                                                                                                                                                                                                              |                              |
| 12 |                          |    |                                                                                                                                                                                                              |                              |
| 13 | Key results              | 18 | Summarise key results with reference to study objectives                                                                                                                                                     | 10-11                        |
| 14 | Limitations              | 19 | Discuss limitations of the study, taking into account sources of potential bias or imprecision. Discuss both direction and magnitude of any potential bias                                                   | 11-12                        |
| 15 |                          |    |                                                                                                                                                                                                              |                              |
| 16 | Interpretation           | 20 | Give a cautious overall interpretation of results considering objectives, limitations, multiplicity of analyses, results from similar studies, and other relevant evidence                                   | 12-13                        |
| 17 |                          |    |                                                                                                                                                                                                              |                              |
| 18 |                          |    |                                                                                                                                                                                                              |                              |
| 19 | Generalisability         | 21 | Discuss the generalisability (external validity) of the study results                                                                                                                                        | 11                           |
| 20 |                          |    |                                                                                                                                                                                                              |                              |
| 21 | <b>Other information</b> |    |                                                                                                                                                                                                              |                              |
| 22 | Funding                  | 22 | Give the source of funding and the role of the funders for the present study and, if applicable, for the original study on which the present article is based                                                | 13                           |
| 23 |                          |    |                                                                                                                                                                                                              |                              |
| 24 |                          |    |                                                                                                                                                                                                              |                              |

25  
26 \*Give information separately for exposed and unexposed groups.

27  
28 **Note:** An Explanation and Elaboration article discusses each checklist item and gives methodological background and  
29 published examples of transparent reporting. The STROBE checklist is best used in conjunction with this article (freely  
30 available on the Web sites of PLoS Medicine at <http://www.plosmedicine.org/>, Annals of Internal Medicine at  
31 <http://www.annals.org/>, and Epidemiology at <http://www.epidem.com/>). Information on the STROBE Initiative is  
32 available at <http://www.strobe-statement.org>.  
33  
34  
35  
36  
37  
38  
39  
40  
41  
42  
43  
44  
45  
46  
47  
48  
49  
50  
51  
52  
53  
54  
55  
56  
57  
58  
59  
60
