# Supplementary material for: Association between household context and emergency hospital use in older people: a retrospective cohort study on indicators for people living alone or living with somebody with frailty, developed from routine healthcare data in England
Source: PubMed Central journal article supplement — BMJ Open. 2022 May 2;12(5):e059371. doi: 10.1136/bmjopen-2021-059371 (PMC9062795; doi:10.1136/bmjopen-2021-059371), 2022-05-02
Supplement: bmjopen-2021-059371supp003.pdf [file bmjopen-2021-059371supp003.pdf]

Supplementary File 3: Subgroup analyses: interaction results (a) living alone and deprivation and b) living with someone with frailty and gender. Created by the authors

|                                                                | A&E attendance |                |                              | Emergency admissions |                |                              |
|----------------------------------------------------------------|----------------|----------------|------------------------------|----------------------|----------------|------------------------------|
|                                                                | Rate ratio     | 95%CI          | P value for interaction term | Rate ratio           | 95%CI          | P value for interaction term |
| <b>Living alone<sup>a</sup></b>                                |                |                |                              |                      |                |                              |
| Living alone, IMD quintile 5 (least deprived, reference group) | 1.11           | (1.10 to 1.11) |                              | 1.17                 | (1.15 to 1.18) |                              |
| Living alone, IMD quintile 4                                   | 1.09           | (1.08 to 1.10) | 0.012                        | 1.14                 | (1.13 to 1.16) | 0.009                        |
| Living alone, IMD quintile 3                                   | 1.11           | (1.10 to 1.12) | 0.548                        | 1.17                 | (1.15 to 1.18) | 0.993                        |
| Living alone, IMD quintile 2                                   | 1.09           | (1.08 to 1.10) | 0.005                        | 1.14                 | (1.13 to 1.15) | 0.001                        |
| Living alone, IMD quintile 1 (most deprived)                   | 1.07           | (1.06 to 1.08) | <0.001                       | 1.10                 | (1.09 to 1.11) | <0.001                       |
| <b>Living with someone with frailty<sup>b</sup></b>            |                |                |                              |                      |                |                              |
| Living with someone with frailty, female (reference group)     | 1.08           | (1.07 to 1.10) |                              | 1.10                 | (1.09 to 1.12) |                              |
| Living with someone with frailty, male                         | 1.10           | (1.09 to 1.11) | 0.101                        | 1.09                 | (1.08 to 1.11) | 0.297                        |

<sup>a</sup>Adjusted for covariates listed in supplementary file 2, and interaction term for living alone and quintiles of deprivation.

<sup>b</sup>Adjusted for covariates listed in supplementary file 2, and interaction term for living with someone with frailty and gender.
