# Supplementary material for: Association between household context and emergency hospital use in older people: a retrospective cohort study on indicators for people living alone or living with somebody with frailty, developed from routine healthcare data in England
Source: PubMed Central journal article supplement — BMJ Open. 2022 May 2;12(5):e059371. doi: 10.1136/bmjopen-2021-059371 (PMC9062795; doi:10.1136/bmjopen-2021-059371), 2022-05-02
Supplement: bmjopen-2021-059371supp004.pdf [file bmjopen-2021-059371supp004.pdf]

Supplementary File 4. Sensitivity analyses: study population limited to individuals whose household composition did not change over the study period, and not adjusting for history of emergency hospital use. Created by the authors

|                                                                                                                                                               | N         | Rate ratio | 95%CI          | P value |
|---------------------------------------------------------------------------------------------------------------------------------------------------------------|-----------|------------|----------------|---------|
| <b>Living alone: study population limited to individuals whose household composition did not change over the study period<sup>a</sup></b>                     |           |            |                |         |
| A&E attendances                                                                                                                                               | 4,601,533 | 1.06       | (1.06 to 1.07) | <0.001  |
| Emergency admissions                                                                                                                                          | 4,601,533 | 1.10       | (1.09 to 1.10) | <0.001  |
| <b>Living alone: not adjusting for history of emergency hospital use<sup>b</sup></b>                                                                          |           |            |                |         |
| A&E attendances                                                                                                                                               | 4,876,285 | 1.11       | (1.11 to 1.12) | <0.001  |
| Emergency admissions                                                                                                                                          | 4,876,285 | 1.16       | (1.15 to 1.16) | <0.001  |
| <b>Living with someone with frailty: study population limited to individuals whose household composition did not change over the study period<sup>a</sup></b> |           |            |                |         |
| A&E attendances <sup>c</sup>                                                                                                                                  | 2,266,187 | 1.08       | (1.07 to 1.09) | <0.001  |
| Emergency admissions <sup>c</sup>                                                                                                                             | 2,266,187 | 1.08       | (1.07 to 1.09) | <0.001  |
| <b>Living with someone with frailty: not adjusting for history of emergency hospital use<sup>b</sup></b>                                                      |           |            |                |         |
| A&E attendances <sup>d</sup>                                                                                                                                  | 2,459,937 | 1.11       | (1.10 to 1.12) | <0.001  |
| Emergency admissions <sup>d</sup>                                                                                                                             | 2,459,937 | 1.11       | (1.10 to 1.12) | <0.001  |

<sup>a</sup>Adjusted for covariates listed in Supplementary File 2.

<sup>b</sup>Adjusted for covariates listed in Supplementary File 2 excluding emergency hospital use in the 12 months prior to analysis period.

<sup>c</sup>Note: A&E attendances: rate ratio 1.083 (95% CI 1.075 to 1.092). Emergency admissions: rate ratio 1.081 (95% CI 1.070 to 1.093).

<sup>d</sup>Note: A&E attendances: rate ratio 1.110 (95% CI 1.101 to 1.118). Emergency admissions: rate ratio 1.111 (95% CI 1.100 to 1.123).
