# Supplementary figures and images for: Association between household context and emergency hospital use in older people: a retrospective cohort study on indicators for people living alone or living with somebody with frailty, developed from routine healthcare data in England
Source: PubMed Central journal article supplement — BMJ Open. 2022 May 2;12(5):e059371. doi: 10.1136/bmjopen-2021-059371 (PMC9062795; doi:10.1136/bmjopen-2021-059371), 2022-05-02

## Supplementary File 1. Inclusion and Exclusion Flow Chart. Created by the authors

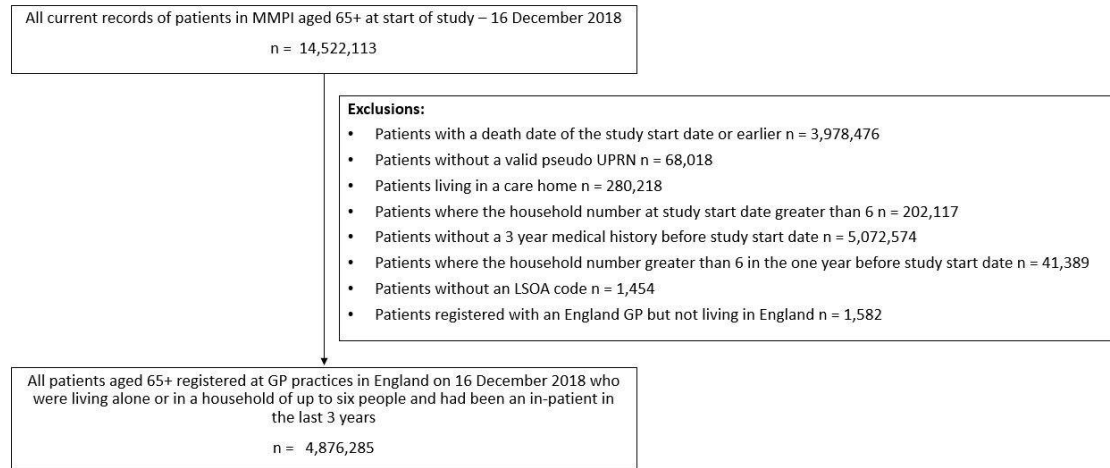

Supplement: bmjopen-2021-059371supp001.pdf [file bmjopen-2021-059371supp001.pdf]
